1    **Mathematical modelling to estimate the impact of maternal**  
2    **and perinatal healthcare services and interventions on**  
3    **health in sub-Saharan Africa: A scoping review**

4    Joseph H Collins<sup>1\*</sup>, Valentina Cambiano<sup>1</sup>, Andrew N. Phillips<sup>1</sup>, Tim Colbourn<sup>1</sup>

5    1. Institute for Global Health, University College London, London, UK

6    \* Corresponding author

7    Email: [joseph.h.collins@ucl.ac.uk](mailto:joseph.h.collins@ucl.ac.uk) (JHC)

8

9

10

11

12

13

14

15

16

17

18

19

**NOTE: This preprint reports new research that has not been certified by peer review and should not be used to guide clinical practice.**

## 20 **Abstract**

21 Mathematical modelling is a commonly utilised tool to predict the impact of policy on  
22 health outcomes globally. Given the persistently high levels of maternal and perinatal  
23 morbidity and mortality in sub-Saharan Africa, mathematical modelling is a  
24 potentially valuable tool to guide strategic planning for health and improve outcomes.  
25 The aim of this scoping review was to explore how modelling has been used to  
26 evaluate the delivery of maternal and/or perinatal healthcare interventions or  
27 services and predict their impact on health-related outcomes in the region. A search  
28 across three databases was conducted in November 2023 which returned 8660  
29 potentially relevant studies, from which 60 were included in the final review.  
30 Characteristics of these studies, the interventions which were evaluated, the models  
31 utilised, and the analyses conducted were extracted and summarised. Findings  
32 suggest that the popularity of modelling within this field is increasing over time with  
33 most studies published after 2015 and that population-based, deterministic, linear  
34 models were most frequently utilised, with the Lives Saved Tool being applied in  
35 over half of the reviewed studies (n=34, 57%). Much less frequently (n=6) models  
36 utilising system-thinking approaches, such as individual-based modelling or systems  
37 dynamics modelling, were developed and applied. Models were most applied to  
38 estimate the impact of interventions or services on maternal or neonatal mortality  
39 outcomes with morbidity-related outcomes and stillbirth reported on much less often.  
40 Going forward, given that healthcare delivery systems have long been identified as  
41 complex adaptive systems, modellers may consider the advantages of applying  
42 systems-thinking approaches to evaluate the impact of maternal and perinatal health  
43 policy. Such approaches allow for a more realistic and explicit representation of the

44 systems- and individual- level factors which impact the effectiveness of interventions  
45 delivered within health systems.

46

## 47 **Introduction**

48 The evaluation of the impact of healthcare programmes or policies on population  
49 health is a central component of public health, epidemiological and health economics  
50 science. Whilst the effects of biomedical interventions, such as drugs, on health  
51 outcomes are almost exclusively evaluated using randomised control trials (RCTs),  
52 experimental measurement of the direct effect of health policy interventions (e.g.,  
53 changes to service coverage), may not be feasible due to ethical or practical  
54 constraints (1). In such instances, mathematical models, defined here as models  
55 which “set out a theoretical framework that represent the causal pathways and  
56 mechanisms linking exposures, interventions, and infection or disease”, can be  
57 utilised to estimate policy intervention effectiveness (1). Whilst the structure,  
58 assumptions and relative merits or limitation of such models varies considerably (1),  
59 the inherent flexibility of mathematical modelling, coupled with other intrinsic benefits  
60 such as lower relative cost when compared to experimentation, and the ability to  
61 synthesise multiple different data sources, has meant that they have come to be  
62 used extensively in the development of health policy at both the local governmental  
63 (2) and the global (3) levels.

64

65 Importantly, the application of mathematical models to inform health policy has the  
66 potential to generate significant health gains, particularly within the field of global

67 maternal and newborn health. Evidence suggests that, despite significant progress  
68 since the turn of the century (4,5), maternal and perinatal mortality remains  
69 unacceptably high, particularly in regions such as southeast Asia and sub-Saharan  
70 Africa (SSA) (6–8), due in part to insufficient coverage and quality of key maternity  
71 services (9–14). As such, there are a substantial number of pertinent policy  
72 questions regarding how best to deliver high-quality maternity services to mothers  
73 and newborns to reduce mortality and maximise health which are of particular  
74 interest to policy makers within the region. This is especially true given the  
75 prominence of maternal and newborn health metrics within the health-related  
76 Sustainable Development Goals targets (15). For example, significant attention is  
77 now being paid to the potential health gains associated with maternity service  
78 delivery redesign (16,17), defined as the “intentional reorganisation of a health  
79 system to improve equity, quality, and outcomes” (17) which entails redesigning  
80 maternity services so that births occur exclusively within higher level or advanced  
81 facilities in line with practice in most high-income countries (16). Evaluation of such  
82 policies through experimentation, such as through a cluster RCT, is associated with  
83 substantial ethical constraints such as a potential lack of clinical equipoise.

84 Additionally, certain outcomes of interest, such as maternal mortality, may be  
85 sufficiently rare that the required sample size is prohibitive to conducting a trial. In  
86 such circumstances, mathematical modelling may offer important insights into the  
87 potential impact of alternative configurations of intervention or service delivery.

88

89 Whilst there is evidence of the growing use of modelling approaches within public  
90 health more generally (18), to date there has been no systematic evaluation of the  
91 broad application of mathematical modelling to evaluate maternal and newborn

92 services within the region of SSA. The review presented here has therefore been  
93 conducted to answer the primary research question of: *“How have mathematical*  
94 *models been used to evaluate the delivery of maternal and/or perinatal healthcare*  
95 *interventions or services and their impact on health-related outcomes in sub-*  
96 *Saharan Africa?”*. To best answer this question, the review has three primary  
97 objectives: (i) to characterise and map the relevant literature base; (ii) to explore the  
98 characteristics of the models and modelling studies found within this literature and  
99 (iii) to critically discuss the most common modelling approaches utilised. Systematic  
100 evaluation of the relevant literature allows for identification of common approaches  
101 taken, trends in study and model characteristics and potential gaps within the  
102 literature. Due to the broad scope of the research question and inclusion criteria we  
103 considered it appropriate to conduct a scoping review as opposed to a systematic  
104 review.

105

## 106 **Materials and methods**

107 Levac et al’s. (19) framework was chosen to guide the conduct of this review as it  
108 provided the most comprehensive and clear guidance building upon the original six-  
109 stage framework for scoping review conduct developed by Arksey and O’Malley (20).  
110 This framework was utilised in tandem to the PRISMA-ScR checklist developed by  
111 the Joanna Briggs institute (21) to ensure the content of the review is in keeping with  
112 recommended best practice. The checklist for this review is provided in the  
113 supporting information (S1 File). We did not previously develop a review protocol.

114

## 115 **Inclusion criteria**

116 Studies were eligible for inclusion if they described analyses using a mathematical  
117 model, as defined in the introduction, which reported the potential effect of the  
118 implementation or change in coverage of a maternal or perinatal health intervention  
119 on maternal or perinatal epidemiological or health related outcomes.

120

121 Maternal and perinatal healthcare interventions or services (referred to as  
122 interventions for the remainder of this review) are those interventions delivered as  
123 part of antenatal, intrapartum, or postpartum care to women at any stage along the  
124 pregnancy continuum (i.e., from conception to 42 days postnatal) or their newborns  
125 (i.e., from birth to day 28). For mothers, we only consider interventions intended to  
126 prevent morbidity or mortality associated with conditions or complications directly  
127 caused by the processes of pregnancy or birth.

128

129 Health outcomes include any measure of morbidity or mortality within the target  
130 population. This is not limited to the primary outcomes of the study and any studies  
131 which report outcomes partially derived from other health outcomes (e.g.,  
132 Incremental Cost Effectiveness Ratio (ICER)) or that report health outcomes as  
133 secondary outcomes were included.

134

135 The geographical area of focus for this review was SSA with the full list of included  
136 countries being adapted from the UN Statistics Division geographic regions (22).  
137 Whilst the term SSA is a largely arbitrary categorisation of many extremely

138 heterogenous and diverse countries, it was deemed a logical regional category as  
139 this grouping of African nations has been used extensively within the global health  
140 literature and therefore utilised to ensure the maximum number of relevant papers  
141 were returned.

142

143 Finally, papers in which mathematical models were described but not applied were  
144 not included, however those which used models previously applied in were. In  
145 addition, only English language papers were included in the review due to  
146 unavailable resources to undertake translation and/or non-English language  
147 searches.

148

## 149 **Search strategy**

150 A multi-stage search strategy was employed to identify relevant studies for inclusion.  
151 First, a systematic search of three electronic databases was undertaken during  
152 November 2023. The databases included PubMed, Web of Science and Global  
153 Health (1973- present). Once relevant studies were identified, a hand-search of the  
154 bibliographies of selected studies was undertaken to identify any additional relevant  
155 sources of information. Table 1 presents the search terms used for searching the  
156 electronic databases. Due to the proliferation of studies identified in the first stage in  
157 which analyses were conducted using the Lives Saved Tool (LiST) (23), we  
158 undertook an additional search using the PubMed database using the search term  
159 “lives saved tool” to ensure all relevant studies were included in the final sample.

160

161 **Table 1. Search terms used in database search of scoping review**

| Key term/concept                        | Search Terms                                                                                                                                                                                                                                                                                                                                                                                                                                                                                                                                                                                                                                                                                                                                                                                                                 |
|-----------------------------------------|------------------------------------------------------------------------------------------------------------------------------------------------------------------------------------------------------------------------------------------------------------------------------------------------------------------------------------------------------------------------------------------------------------------------------------------------------------------------------------------------------------------------------------------------------------------------------------------------------------------------------------------------------------------------------------------------------------------------------------------------------------------------------------------------------------------------------|
| <i>Mathematical Model(s)</i>            | ("mathematical" OR "disease" OR "microsimulation" OR "deterministic" OR "stochastic" OR "compartment*" OR "individual-based" OR "individual based" OR "agent-based" OR "agent based" OR "discrete-event" OR "time to event" OR "system dynamics" OR "monte carlo" OR "markov chain" OR "simulation") AND ("model*" OR "simulat*")                                                                                                                                                                                                                                                                                                                                                                                                                                                                                            |
| <i>Maternal and/or Perinatal Health</i> | "matern*" OR "pregnan*" OR "obstetric*" OR "antenatal care" OR "prenatal care" OR "postnatal care" OR "postpartum care" OR "birth attendan*" OR "intrapartum care" OR "labour and delivery" OR "facility delivery" OR "child birth" OR "childbirth" OR "neonat*" OR "perinatal" OR "newborn" OR "new born" OR "BEmONC" OR "EmONC" OR "CEmONC" OR "emergency obstetric and newborn care" OR "emergency obstetric and new born care"                                                                                                                                                                                                                                                                                                                                                                                           |
| <i>Sub-Saharan Africa</i>               | Angola* OR Benin OR Botswana* OR "British Indian Ocean Territory" OR "Burkina Faso" OR Burundi* OR "Cabo Verde" OR Cameroon* OR "Central African Republic" OR Chad OR Congo OR Comoros OR "Cote d'ivoire" OR "Democratic Republic of the Congo" OR Djibouti* OR Eswatini* OR Eritrea* OR Ethiopia* OR "equatorial guinea" OR "French Southern Territories" OR Gabon OR Gambia* OR Ghana* OR guinea OR "Guinea-Bissau" OR Kenya* OR Lesotho OR Liberia* OR Madagascar* OR Malawi* OR Mali* OR Mauritania* OR Mauriti* OR Mayotte OR Mozambi* OR Namibia* OR Niger* OR Nigeria* OR "Saint Helena" OR Reunion OR Rwanda* OR "Sao tome and Principe" OR Senegal* OR Seychell* OR "Sierra Leon*" OR Somalia* OR "South Africa*" OR "South Sudan" OR Tanzania* OR Togo* OR Uganda* OR Zambia* OR Zimbabwe* OR "sub-Saharan Africa" |

162

163 Citations returned from each database search were imported into Mendeley Desktop

164 citation manager (v1.19.8) and pooled. Using in-built functionality automatic

165 deduplication was undertaken followed by a manual review of returned studies to

166 ensure any duplicates missed by the automatic search were removed.

167



## 168 **Study selection**

169 A three-step process was employed to identify relevant studies from retrieved titles;  
170 1.) the titles of the total number of retrieved citations were screened for apparent  
171 relevance using the inclusion criteria, 2.) the potentially relevant studies were  
172 separated then screened by the contents of their abstract against the eligibility  
173 criteria, 3.) those which still appeared relevant were screened through review of the  
174 full text and included in the review if appropriate. This process was mirrored with any  
175 studies identified via the hand-search of the reference lists of the final studies  
176 selected from the database and those identified through the targeted search. Despite  
177 recommendations within current methodological frameworks that this process, and  
178 the process of extraction and analysis, should be conducted by a multidisciplinary  
179 team to improve the validity of the review's findings (19,21,24,25), this review was  
180 initially conducted as part of the first authors Ph.D. and therefore was conducted with  
181 no additional authors.

182

## 183 **Data extraction and analysis**

184 Following the selection of relevant studies, data was abstracted from the final studies  
185 via a data abstraction form. The development and use of a unique abstraction form is  
186 central to scoping review methodology and allows researchers to identify and extract  
187 all pertinent information from a given study which relates directly to the reviews  
188 primary research question (19,26). As such a preliminary data extraction form was  
189 first developed and trialled on a subset of five studies, in-keeping with recommended  
190 scoping review practice (19,26), however due to the significant heterogeneity in  
191 study methods and analyses a second round of trialling was conducted on a further

192 five studies after the initial refinement of the data extraction form. Within the final  
193 form 35 unique data items are identified. They can broadly be categorised as general  
194 characteristics of the study (8 items), characteristics of modelled interventions (9  
195 items), characteristics of the mathematical model (7 items) and characteristics of any  
196 conducted analyses (11 items). The final completed data extraction form can be  
197 found in the supporting information (S2 File).

198

199 Data items relating to model characteristics were adapted from Garnett et al. (1),  
200 where the authors provide defining criteria relevant across different mathematical  
201 modelling methodologies. These criteria, which have been refined for data  
202 extraction, include how feedback between interventions and outcomes are  
203 represented in the modelled system, the role chance plays in model behaviour, how  
204 individuals are represented within the model and how variable change is governed  
205 with regards to time (1).

206

207 Following data extraction, data items were synthesised quantitatively where  
208 appropriate (i.e., in the presentation of percentages and frequencies) and  
209 summarised under relevant subheadings presented in the following section.

## 210 **Results**

### 211 **Search results**

212 A total of 10,980 potentially relevant studies were identified, which was reduced to  
213 8,660 after the removal of duplicates. Following title screening, the abstracts of 150

214 papers were screened (including all papers from hand-searching) using the inclusion  
215 criteria followed by full-text screening of 90 most relevant. Of these studies a further  
216 30 were excluded leaving a final total of 60 papers for review (27–86). Figure 1  
217 provides a diagrammatic representation of the search and screening processes  
218 within this review.

219

220 **Figure 1. PRISMA diagram reporting search results**

221

## 222 **General study characteristics**

223 Table 2 details the general characteristics of the included studies. The publication  
224 date of the included studies skewed towards the latter half of the 2010s, with 70% of  
225 studies published after 2015 (n=42) and the greatest number of studies being  
226 published in 2019 (n=9 (15%)). In over half of studies (n=33, 55%) the modelled  
227 ‘population’ was representative of a single country, whilst the remaining studies  
228 either modelled interventions applied to populations at a regional level, such as sub-  
229 Saharan Africa (n=8), or to two or more countries or regions (n=19).

230

231 **Table 2. General characteristics of the reviewed studies**

| <b>General study characteristics</b> | <b>Studies<br/>(N=60)</b> | <b>Percentage<br/>(%)</b> |
|--------------------------------------|---------------------------|---------------------------|
| <i>Year of publication:</i>          |                           |                           |
| Pre 2010                             | <b>4</b>                  | <b>7%</b>                 |
| 2010-2014                            | <b>14</b>                 | <b>23%</b>                |
| 2015-2019                            | <b>34</b>                 | <b>57%</b>                |
| 2020-2023                            | <b>8</b>                  | <b>13%</b>                |

|                                                                                            |           |            |
|--------------------------------------------------------------------------------------------|-----------|------------|
| <i>Single or multiple countries modelled:</i>                                              |           |            |
| Single                                                                                     | <b>33</b> | <b>55%</b> |
| Multiple                                                                                   | <b>27</b> | <b>45%</b> |
| <i>Most modelled countries (top 5) <sup>a</sup></i>                                        |           |            |
| Ethiopia                                                                                   | <b>21</b> | <b>35%</b> |
| Tanzania                                                                                   | <b>19</b> | <b>32%</b> |
| Uganda                                                                                     | <b>18</b> | <b>30%</b> |
| Kenya                                                                                      | <b>18</b> | <b>30%</b> |
| Malawi                                                                                     | <b>16</b> | <b>27%</b> |
| <i>In addition to health outcomes the study aimed to evaluate cost/cost-effectiveness:</i> |           |            |
| Yes                                                                                        | <b>22</b> | <b>37%</b> |
| No                                                                                         | <b>38</b> | <b>63%</b> |
| <i>First author affiliation:</i>                                                           |           |            |
| Within study country                                                                       | <b>18</b> | <b>30%</b> |
| Outside study country                                                                      | <b>42</b> | <b>70%</b> |
| <i>Any author based at institution within the/a study country:</i>                         |           |            |
| Yes                                                                                        | <b>31</b> | <b>52%</b> |
| No                                                                                         | <b>29</b> | <b>48%</b> |

<sup>a</sup>Sourced from studies which explicitly listed modelled countries. Additionally, multiple countries are modelled in many papers therefore values in this row when summed exceed the total number of papers

232

233 Location of the affiliated institution of the first study author was extracted, alongside  
 234 whether any co-authors were based in institutions within study countries. Seventy  
 235 percent (n=40) of studies' first authors institutions were not located in any of the  
 236 study countries with nearly half of total studies led by a first author based at an  
 237 institution in the United States (n=29, 48%) and only seventeen studies (28%) were  
 238 led by first authors based at institutions within SSA. As evident in Table 2,  
 239 approximately half of studies (n=29) had no authors based at an affiliated institution  
 240 within any of the study countries.

241

242 Finally, the primary aim of included studies was evaluated. Whilst all studies reported  
243 at least one outcome associated with either maternal or perinatal health in line with  
244 inclusion criteria, over a third (n=22, (37%)) aimed to estimate costs associated with  
245 modelled interventions or calculate the interventions' cost-effectiveness.

246

### 247 **Intervention characteristics**

248 Table 3 summarises extracted data relating to the interventions evaluated within the  
249 reviewed studies. Interventions were extracted, as written, from either within the  
250 main text or supplementary material if indicated by authors. They were then  
251 alphabetised to assess frequency and, where wording differed slightly between  
252 interventions which could reasonably be considered the same, this was corrected.

253

254 **Table 3. Characteristics of the interventions included within the reviewed**  
255 **studies**

| <b>Intervention characteristics</b>                                                         | <b>Studies<br/>(N=60)<sup>a</sup></b> | <b>Percentage (%)</b> |
|---------------------------------------------------------------------------------------------|---------------------------------------|-----------------------|
| Study evaluated a single or multiple interventions:                                         |                                       |                       |
| <i>Single</i>                                                                               | <b>8</b>                              | <b>13%</b>            |
| <i>Multiple</i>                                                                             | <b>52</b>                             | <b>87%</b>            |
| Study modelled an intervention not currently delivered as part of routine service delivery: |                                       |                       |
| Yes                                                                                         | <b>7</b>                              | <b>12%</b>            |
| No                                                                                          | <b>53</b>                             | <b>88%</b>            |

|                                                                                  |           |            |
|----------------------------------------------------------------------------------|-----------|------------|
| Study includes interventions delivered to:                                       |           |            |
| <i>Women</i>                                                                     | <b>57</b> | <b>95%</b> |
| <i>Neonates</i>                                                                  | <b>41</b> | <b>69%</b> |
| If a study modelled any interventions delivered to mothers, they were delivered: |           |            |
| <i>Antenatally</i>                                                               | <b>47</b> | <b>78%</b> |
| <i>During labour/birth</i>                                                       | <b>43</b> | <b>72%</b> |
| <i>Postnatally</i>                                                               | <b>41</b> | <b>68%</b> |
| Study modelled interventions targeting:                                          |           |            |
| <i>Maternal health outcomes</i>                                                  | <b>42</b> | <b>70%</b> |
| <i>Neonatal health outcomes</i>                                                  | <b>46</b> | <b>77%</b> |
| <i>Stillbirths</i>                                                               | <b>17</b> | <b>28%</b> |
| Most evaluated interventions (Top 5) <sup>b</sup> :                              |           |            |
| 1. <i>Immediate assessment and stimulation / Neonatal resuscitation</i>          | <b>34</b> | <b>57%</b> |
| 2. <i>Skilled birth attendance</i>                                               | <b>32</b> | <b>53%</b> |
| 3. <i>Vitamin A supplementation</i>                                              | <b>24</b> | <b>40%</b> |
| 4. <i>Clean birth or postnatal practices</i>                                     | <b>24</b> | <b>40%</b> |
| 5. <i>Magnesium Sulphate</i>                                                     | <b>20</b> | <b>33%</b> |

<sup>a</sup>The values in the some of the rows exceed the total number of papers when summed, as most studies modelled multiple interventions.

<sup>b</sup>Excluding those interventions which are not routinely delivered as part of antenatal, intrapartum, or postpartum care

256

257 There was extensive heterogeneity between studies in relation to the interventions  
 258 which were evaluated by mathematical models and the ways in which interventions  
 259 were defined. Across the 60 included studies a total of 1055 interventions (inclusive  
 260 of duplicates) were described, with most studies (n=52 (87%)) evaluating the impact  
 261 of multiple different interventions and fewer studies evaluating single interventions.  
 262 This value includes all modelled interventions including those which are delivered  
 263 outside routine antenatal, intrapartum, or postpartum care or represented nonclinical  
 264 interventions such as improved access to clean water.

265

266 Commonly, studies evaluated scale-up of interventions which could reasonably be  
267 defined as part of standard clinical practice in most settings (e.g., basic newborn  
268 resuscitation). Much less frequently, (n=7, 12%) studies evaluated novel  
269 interventions which are not routinely available to mothers or newborns in most  
270 settings. This includes studies in which the aim was to predict the effect of an  
271 intervention on health outcomes that acts through improving coverage of other key  
272 maternity services. For example, Wilcox et al. (28) predicted the impact of a Mobile  
273 Technology for Community Health initiative in Ghana which has been shown to  
274 improve skilled birth attendance and facility delivery and modelled the effect of this  
275 intervention using LiST. Other examples include Carvalho et al. (55) in which the  
276 authors estimated the cost-effectiveness and health impacts of an inhaled oxytocin  
277 product and Ali et al. (58) who evaluated the Augmented Infant Resuscitator, a novel  
278 device which provides real-time feedback on ventilation quality during the  
279 resuscitation of newborns.

280

281 Almost all studies evaluated at least one intervention which was delivered to women  
282 (N=57 (95%)), even including those in which maternal outcomes were not evaluated  
283 or reported (e.g., evaluating the effect of maternal nutritional supplementation in  
284 ANC on newborn outcomes). As shown in Table 3 these interventions were most  
285 frequently delivered during the antenatal and intrapartum periods of pregnancy whilst  
286 postpartum interventions delivered to mothers were less frequent (n=41, 68%). The  
287 evaluation of interventions delivered to neonates occurred slightly more frequently  
288 and was presented in over two-thirds of studies (n=41 (68%)). Of the studies in  
289 which only neonatal interventions were evaluated (n=2), Tsiachristas et al. (29)  
290 evaluated a task shifting intervention for routine nursing tasks delivered to neonates

291 in a Kenyan neonatal intensive care unit (NICU) whilst Ali et al. (58) has been  
 292 described above.

293

## 294 **Model characteristics**

295 Table 4 summarises the extracted data relating to the models applied within the  
 296 reviewed studies. Approximately a quarter (n=16 (27%)) of studies utilised a model  
 297 which had been developed specifically for the purpose of achieving one or more of  
 298 the study's aims whilst the remaining employed models which had been developed  
 299 prior to study conduct. Over half of studies (n=34, 57%) reported analyses conducted  
 300 using LiST, and eight studies (13%) using the Maternal and Neonatal Directed  
 301 Assessment of Technology model (MANDATE).

302

303 **Table 4. Characteristics of the models within the reviewed studies**

| <b>Model characteristics</b>                                                       | <b>Studies<br/>(N=59)</b> | <b>Percentage<br/>(%)</b> |
|------------------------------------------------------------------------------------|---------------------------|---------------------------|
| Was the model developed to conduct this study:                                     |                           |                           |
| Yes                                                                                | <b>16</b>                 | <b>27%</b>                |
| No                                                                                 | <b>44</b>                 | <b>73%</b>                |
| Model employed by study authors:                                                   |                           |                           |
| <i>LiST</i>                                                                        | <b>34</b>                 | <b>57%</b>                |
| <i>Maternal and Neonatal Directed Assessment<br/>of Technology model (MANDATE)</i> | <b>8</b>                  | <b>13%</b>                |
| <i>Decision Tree/Analytic model</i>                                                | <b>7</b>                  | <b>12%</b>                |
| <i>Individual or Agent-based model</i>                                             | <b>5</b>                  | <b>8%</b>                 |
| <i>Systems-dynamics model</i>                                                      | <b>1</b>                  | <b>2%</b>                 |



|                                                     |           |            |
|-----------------------------------------------------|-----------|------------|
| <i>Other/Undefined</i>                              | <b>5</b>  | <b>8%</b>  |
| Model structure, use or data and reporting:         |           |            |
| <i>System feedback – Linear</i>                     | <b>58</b> | <b>97%</b> |
| <i>System feedback – Non-linear</i>                 | <b>2</b>  | <b>3%</b>  |
| <i>Deterministic</i>                                | <b>55</b> | <b>92%</b> |
| <i>Stochastic</i>                                   | <b>5</b>  | <b>8%</b>  |
| <i>Population/cohort based.</i>                     | <b>55</b> | <b>92%</b> |
| <i>Individual-based</i>                             | <b>5</b>  | <b>8%</b>  |
| <i>Time represented as calendar time.</i>           | <b>53</b> | <b>88%</b> |
| <i>Time represented with age</i>                    | <b>7</b>  | <b>12%</b> |
| <i>Diagrammatic representation in manuscript</i>    | <b>13</b> | <b>22%</b> |
| <i>No diagrammatic representation in manuscript</i> | <b>47</b> | <b>78%</b> |

304

305 Of the remaining studies in the sample, most utilised a decision tree/analytic model  
 306 (n=7). These models, commonly used in health economic analysis, represent  
 307 potential treatment pathways as a series of ‘branches’ demarcated by decision  
 308 nodes, representing some decision of interest (e.g., the decision to deliver a  
 309 screening intervention) and chance nodes from which mutually exclusive  
 310 probabilities of a set of outcomes following a decision are represented (87,88). Other  
 311 types of models were utilised much less frequently with only 5 (8%) studies  
 312 employing an individual-based framework (27,32,34,68,86).

313

314 Model characteristics were extracted from all included studies guided in part by  
 315 Garnett et al. (1). Considering whether the link between a given intervention and the  
 316 health outcome in the model is represented as a linear or non-linear function, 95% of  
 317 models can be described as linear (n=57). A simple linear model would assume that

318 if a given treatment halves the risk of disease acquisition, and that treatment is  
319 delivered to everyone at risk of the condition, then the incidence of that condition  
320 would reduce by half in the population. Linear representations are common in cohort  
321 models where it is assumed that the outcome of different individuals represented in  
322 the model is independent (i.e., treatment delivered or not delivered within the model  
323 to one individual does not affect the treatment or outcomes of others). The fact that  
324 most models reviewed here are linear is unsurprising due to the number of studies  
325 using either LiST or the MANDATE model which both are self-described as linear.  
326 Alternatively, models which represent this link as non-linear functions were much  
327 less common (n=2) (31,34).

328

329 Next, considering the incorporation of chance into the modelling framework, few  
330 models (n=5, 8%) were found to be stochastic (i.e., events occur to an individual or  
331 population group within the model according to random draws against a probability  
332 parameter), while most utilised a deterministic approach to derive model results,  
333 meaning that multiple model runs with the same parameter set will always return the  
334 same result (n=55). All stochastic models within the review employed an individual-  
335 based approach, where each member of the population is modelled individually with  
336 distinct characteristics which can be tracked, whilst the remaining models included  
337 representation of population level processes and trends using input parameters  
338 representing averages and leading to population-level results.

339

340 Description of model structure and components varied according to model type. Only  
341 13 (22%) papers presented any diagrammatic representation of the model's

342 underlying structure within the manuscript or supplementary material. However, of  
343 the papers without a model diagram over 80% of these papers utilised either LiST or  
344 MANDATE model. Diagrammatic representation of model structure is available for  
345 both these models on their associated websites (89,90). This meant that papers in  
346 which novel models were reported were significantly more likely to include a diagram  
347 of the structure.

348

### 349 **Study analyses and outcomes**

350 Table 5 is a broad overview of the analyses and relevant outcomes extracted from  
351 the reviewed studies. All study outcomes were extracted, as presented, from each  
352 study and then sorted according to categories presented in Table 5. Of note, cost  
353 related outcomes are not included in the table but are available in the supporting  
354 information (S2 File). Maternal and neonatal mortality outcomes were by far the most  
355 frequently reported within the sample with very few studies reporting outcomes which  
356 could reasonably be classified as relating to maternal (n=4, 7%) or neonatal (n=6,  
357 10%) morbidity. Interestingly, of the studies presenting maternal morbidity outcomes  
358 (38,45,55,61) all reported some measure of postpartum haemorrhage incidence or  
359 prevalence whilst newborn morbidity outcomes ranged from the prevalence of  
360 stunting or wasting (56) to the number of cases of intrapartum related neonatal  
361 events and injury (43). Additionally, any measure of the number or rate of stillbirths  
362 within a modelled population was reported in only around a fourth of studies within  
363 the sample (n=14, 23%).

364

### 365 **Table 5. Characteristics of the analyses in the reviewed studies**

| <b>Characteristics of analyses</b>                                                                        | <b>Studies<br/>(N=59)</b> | <b>Percentage<br/>(%)</b> |
|-----------------------------------------------------------------------------------------------------------|---------------------------|---------------------------|
| (Where relevant (n=53)) Calendar-time horizon for analysis was:                                           |                           |                           |
| <i>One year or less</i>                                                                                   | <b>20</b>                 | <b>34%</b>                |
| <i>2-5 years</i>                                                                                          | <b>11</b>                 | <b>18%</b>                |
| <i>6-10 years</i>                                                                                         | <b>5</b>                  | <b>8%</b>                 |
| <i>11+ years</i>                                                                                          | <b>17</b>                 | <b>28%</b>                |
| (Where relevant (n=7)) Age-time horizon for analysis was:                                                 |                           |                           |
| <i>A delivery</i>                                                                                         | <b>3</b>                  | <b>5%</b>                 |
| <i>A pregnancy and delivery</i>                                                                           | <b>1</b>                  | <b>2%</b>                 |
| <i>2 years</i>                                                                                            | <b>1</b>                  | <b>2%</b>                 |
| <i>Lifetime</i>                                                                                           | <b>2</b>                  | <b>3%</b>                 |
| Sensitivity analysis was conducted and reported on:                                                       |                           |                           |
| Yes                                                                                                       | <b>20</b>                 | <b>33%</b>                |
| No                                                                                                        | <b>40</b>                 | <b>67%</b>                |
| Study reported outcome relating to:                                                                       |                           |                           |
| <i>Maternal mortality</i>                                                                                 | <b>34</b>                 | <b>57%</b>                |
| <i>Maternal morbidity</i>                                                                                 | <b>4</b>                  | <b>7%</b>                 |
| <i>Maternal DALYs</i>                                                                                     | <b>6</b>                  | <b>10%</b>                |
| <i>Neonatal mortality</i>                                                                                 | <b>39</b>                 | <b>65%</b>                |
| <i>Neonatal morbidity</i>                                                                                 | <b>6</b>                  | <b>10%</b>                |
| <i>Neonatal DALYs</i>                                                                                     | <b>7</b>                  | <b>12%</b>                |
| <i>Stillbirths</i>                                                                                        | <b>14</b>                 | <b>23%</b>                |
| For multi-country studies (n=27) results were reported by country or as an aggregate over a region/group? |                           |                           |
| <i>Country-specific</i>                                                                                   | <b>9</b>                  | <b>33%</b>                |
| <i>Aggregate</i>                                                                                          | <b>18</b>                 | <b>67%</b>                |

366

367 Additionally, we considered how outcomes were presented for studies in which more

368 than one country population was theoretically modelled. Surprisingly, of the multi-

369 country studies (n=27), only eight reported results from their analysis disaggregated

370 by each included country, with the rest presenting the results for a group of countries  
371 or even an entire region, such as SSA. Whilst for some studies this was an analytical  
372 choice, for those using the MANDATE model authors were limited by the design of  
373 the model which currently only represents the region of SSA or the country of India  
374 within the model's base assumptions (e.g., condition incidence, intervention  
375 availability).

376

## 377 **Discussion**

378 This scoping review has provided a comprehensive and descriptive overview of  
379 mathematical modelling within maternal and perinatal health research within SSA.  
380 Through application of Levac et al's. (19) framework and guided by the recent  
381 PRISMA-ScR checklist (21), a replicable evaluation of the published academic  
382 literature has been undertaken in which the characteristics of relevant mathematical  
383 models and their application in the evaluation of maternal and/or perinatal  
384 interventions has been summarised. Given that the number of studies in the field  
385 utilising these approaches appears to have increased over time, as evidenced in this  
386 review, this is a timely and pertinent overview of commonly utilised modelling  
387 approaches. The proliferation of studies from 2015 onwards could be attributed to  
388 several factors including the utility of such methods in evaluating pathways towards  
389 achieving maternal and perinatal health related goals within the Millennium  
390 Development Goals (MDGs) and Sustainable Development Goals (SDGs), as  
391 demonstrated in several reviewed studies (79–85).

392

393 Our review found that the most often utilised model within this field was LiST, which  
394 was used in nearly sixty percent of the sample. LiST has long been recognised as a  
395 popular tool which has been utilised extensively within the field of global maternal  
396 and child health by a varied group of interdisciplinary stakeholders (91). LiST is a  
397 linear deterministic model as it “describes fixed relationships between inputs and  
398 outputs, and the tool will produce the same outputs each time the model is run with  
399 identical inputs” (92). The primary input is the coverage of an intervention being  
400 evaluated and the primary outputs are either change in the cause-specific mortality  
401 or one of the included “risk factors” for mortality such as stunting (92). LiST is  
402 extremely comprehensive in both the breadth of causes of maternal and child ill-  
403 health which are represented and the range of in-built interventions which modellers  
404 can manipulate within the tool and has been utilised in the evaluation of health  
405 programmes and to inform strategic planning at the national and local level with  
406 some organisations regularly using the tool and embedding LiST into organisational  
407 workflows by developing ‘in-house’ capacity to work with the model (91). Importantly,  
408 as demonstrated in Table 4, many of the other models in this sample share key  
409 characteristics with LiST in that they are linear, deterministic, and changes in the  
410 modelled system are expressed at the population level.

411

412 However, healthcare delivery systems have long been identified as complex  
413 adaptive systems which exhibit explicitly non-linear behaviour by definition (93–95).  
414 Variation in the coverage of established interventions, or integration of new  
415 interventions, may have unexpected down-stream effects on the outcome of interest  
416 despite evidence that the intervention is effective (96,97) which cannot be predicted  
417 using LiST or similar linear models. Within maternal and perinatal health this has

418 been demonstrated in several Low- and middle-income countries (LMICs) in which,  
419 driven by political commitment to achieving the maternal health indicators within  
420 MDG 5 and SDG 3, the proportion of mothers who give birth within a health facility  
421 has increased significantly (96,97). However, this has not been accompanied by an  
422 observed population-level reduction in maternal mortality, despite strong evidence  
423 for the efficacy of interventions delivered to mothers during and following labour  
424 (96,97). The relationship between facility delivery coverage and mortality is complex,  
425 non-linear, and likely influenced by several individual and health system-level factors  
426 relating to quality of care such as the effect of increased volume of patient  
427 attendance and resource use (96,97). Failure to understand the system environment  
428 and behaviours is often a driving factor in the failed implementation of new  
429 interventions, which may have been effective had a systems-thinking lens, one which  
430 considers the potential effect of system level phenomena on intervention or service  
431 implementation, been employed (98–100). This issue is further compounded when  
432 the complexity of the interventions is increased, as many health systems  
433 strengthening interventions are largely programmatic service changes which mean  
434 current evaluation methodologies may be insufficient to produce valid or reliable  
435 outcomes (100).

436

437 Evaluation of relevant health processes at the population level, as taken by most  
438 models in this review, is advantageous in that it is computationally cheap and, in  
439 many circumstances, may be a sufficient level of detail to ascertain a reliable result  
440 (101). However, in recent years, the use of individual-based model (IBMs) has  
441 become more popular within epidemiology and public health (18,102,103). Broadly,  
442 IBMs are a subset of computational simulation models in which the model is

443 designed to replicate the characteristics, behaviours, and actions of a set of ‘agents’,  
444 within a given environment, to reproduce complex population-level or systems  
445 phenomena (104–107). Within epidemiological modelling, these ‘agents’ are often  
446 representative of individual people who may interact with one another to simulate a  
447 hypothetical population of interest, characterised by individual variables, and  
448 governed by sets of predetermined rules (105).

449

450 One of the primary strengths of this approach in the modelling of health processes is  
451 the ability to explicitly model individual-level variation and interactions between said  
452 individuals within the population (104). Within epidemiological modelling, this  
453 approach has been employed in the modelling of infectious diseases, in which  
454 interactions between individuals allows for representation of complex transmission  
455 dynamics within the population (103). This process, often referred to as  
456 ‘interference’, occurs because individuals within the model are not represented as  
457 independent, and therefore the assignment of an exposure, intervention or treatment  
458 can be influenced by outcomes of other individuals in the model (105). Interference  
459 cannot be represented in population-level models where the assumption of non-  
460 independence is not met which means such models are less suitable to explore the  
461 complexities of healthcare delivery. This is demonstrated in the study by Nadkarni et  
462 al. (34), who explicitly represent the relationship between the acuity of a group of  
463 patients in a maternity ward, the associated demand on consumables and, in-turn,  
464 the effect on outcomes.

465



466 Our review found that only 27% of research teams developed novel mathematical  
467 models to answer the research question of interest. Whilst the appeal of using a  
468 previously developed model is clear, the importance of considering country-context  
469 within the evaluation of health policy has long been identified within the literature, as  
470 national and regional context likely has significant impact on how interventions are  
471 implemented and accessed by populations (108). Many modellers have embraced  
472 methods to embed contextual structures into model design through participatory  
473 approaches to model development (109), stakeholder workshops developing causal  
474 loop diagrams (110), or simply through explicitly representing the system of interest  
475 within a given context by supported model validation with key stakeholders (111).  
476 Whilst such approaches were underutilised in the reviewed studies, context-informed  
477 modelling was well demonstrated by Semwanga et al. (31) who developed a novel  
478 systems-dynamics model to explore neonatal health interventions in Uganda through  
479 a process of stakeholder engagement and causal mapping with service users and  
480 policy makers.

481

482 Next, considering the commonly reported outcomes of modelling analyses, this  
483 review found that studies were considerably more likely to report outcomes relating  
484 to either maternal and neonatal mortality and much less likely to predict intervention  
485 effects on morbidity or stillbirths. Limited reporting on morbidity outcomes is not  
486 surprising due to the widespread use of LiST which does not calculate the effect of  
487 interventions on most morbidity outcomes. The absence of morbidity from the  
488 outcomes of modelling studies evaluating health intervention delivery is concerning  
489 considering that many of the routine interventions delivered to mothers and  
490 newborns are intended not only to prevent mortality but to reduce the incidence of

491 common morbidity associated with pregnancy and the newborn period to improve  
492 overall quality of life (112–114). The absence of such outcomes may mean that the  
493 true health impact of improving intervention coverage is significantly underestimated  
494 at the population level.

495

496 Finally, we found that very few of the included studies evaluated the potential impact  
497 of interventions on stillbirths. There are similarities between stillbirth research and  
498 morbidity research, with many arguing that stillbirth has historically been absent from  
499 the global maternal and perinatal health agenda for some time (115–117). Qureshi et  
500 al. (117) suggest that stillbirths should be attributed the same ‘value’ as neonatal  
501 deaths in economic evaluation of maternal health interventions as they are  
502 commonly excluded in measurements such as life years gained or DALYs averted.  
503 This is problematic when considering very early preterm neonatal deaths are  
504 included in neonatal death statistics whilst a stillbirth at 41 weeks gestational age  
505 would not be, despite being more developmentally ‘mature’ (117). Whilst recently a  
506 renewed focus on stillbirth prevention has led to considerable progress (118) a large  
507 number of stillbirths occur per year within SSA (6) and are associated with  
508 considerable morbidity in mothers (119). Importantly several interventions to prevent  
509 stillbirth are well described in the literature through a Cochrane review of relevant  
510 trials (120) and through observational studies (121). As such mathematical modelling  
511 approaches are well positioned to evaluate the context-specific effects of these  
512 interventions in high burden populations.

513

514 There are several important strengths and limitations of this review to acknowledge.  
515 The primary strength of this review is the use of a systematic search strategy to  
516 identify relevant studies and due to the nature and broad scope of the research  
517 question and associated objectives, the scoping review methodology was the most  
518 appropriate choice to map the relevant literature. A traditional systematic review  
519 would not have been appropriate, as the aim of this review was not to synthesise the  
520 reported results of the modelling studies, something that would not have been  
521 possible due to the diverse set of methodologies employed within this research. To  
522 ensure that conduct of the review adhered to contemporary best-practice  
523 frameworks the PRISMA checklist (21) was used to guide the design and conduct of  
524 the review (S1 File).

525

526 Considering this review's limitations, firstly the search strategy did not include  
527 modelling analyses reported within the grey literature. Implicit exclusion of  
528 potentially relevant modelling analyses conducted in reports or government  
529 documentation could introduce bias into the review and potentially alter the review's  
530 conclusions (122). Interestingly, the LiST team highlights in their most recent update  
531 supplement that many applications of the model lie outside of academic publishing,  
532 with efforts being made by the team to enhance the visibility of LiST applications by  
533 policy makers across LMICs (123). Whilst frameworks for the systematic search of  
534 grey literature do exist, they do not alleviate common issues with comprehensive  
535 grey literature searching such as inbuilt search-engine filters which can introduce  
536 bias into source selection (124).

537

538 Secondly, a significant number of modelling studies which evaluated solely the  
539 impact of health interventions on indirect causes of maternal morbidity/mortality were  
540 excluded. This was particularly true for modelling studies evaluating screening and  
541 treatment of HIV during pregnancy on HIV outcomes. Undoubtedly, widening the  
542 studies inclusion criteria so that such studies were reviewed would likely have  
543 changed the results of this review. This is particularly true given the proliferation of  
544 HIV models used to conduct research in SSA (125,126). Finally, this review did not  
545 explicitly consider the quality of included studies by conducting a critical appraisal as  
546 part of the review process. Whilst evaluation of the quality of modelling studies  
547 conducted in this area is undoubtedly important, this process is outside of the remit  
548 of a scoping review (19,127) and is beyond the objectives of this review.

549

550 In conclusion, in this review we have reported on the methodology, conduct and  
551 results of a scoping review to explore the breadth of mathematical modelling  
552 research within evaluation of maternal and perinatal healthcare interventions in SSA.  
553 Results from this review indicate that whilst there is variation in the reviewed studies,  
554 the literature base is dominated by two models which, whilst distinct in their design,  
555 share commonalities in how they represent the relationship between intervention and  
556 outcome, populations of interest and the role randomness plays in the model system.  
557 Individual-based or systems-thinking approaches to mathematical modelling were  
558 much less commonly applied within the field, despite potential advantages such as a  
559 more realistic and explicit representation of the systems- and individual- level factors  
560 that impact the effectiveness of interventions delivered within complex-adaptive  
561 health systems.

562

## 563 **References**

- 564 1. Garnett G, Cousens S, Hallett T, Steketee R, Walker N. Mathematical models  
565 in the evaluation of health programmes. *The Lancet*. 2011;378(9790):515–25.  
566 Available from: <https://pubmed.ncbi.nlm.nih.gov/21481448/>  
567
- 568 2. Panovska-Griffiths J, Kerr CC, Waites W, Stuart RM. Mathematical modeling  
569 as a tool for policy decision making: Applications to the COVID-19 pandemic.  
570 *Handbook of Statistics*. 2021;44:291-326. Available from:  
571 <https://www.ncbi.nlm.nih.gov/pmc/articles/PMC7857083/>  
572
- 573 3. Lo NC, Andrejko K, Shukla P, Baker T, Sawin VI, Norris SL, et al. Contribution  
574 and quality of mathematical modeling evidence in World Health Organization  
575 guidelines: A systematic review. *Epidemics*. 2022;39:1-8. Available from:  
576 <https://pubmed.ncbi.nlm.nih.gov/35569248/>  
577
- 578 4. World Health Organization, UNICEF, UNFPA, World Bank Group,  
579 UNDESA/Population Division. Trends in maternal mortality 2000 to 2020.  
580 2023. Available from: <https://www.who.int/publications/i/item/9789240068759>  
581
- 582 5. Kassebaum NJ, Barber RM, Bhutta ZA, Dandona L, Gething PW, Hay SI, et al.  
583 Global, regional, and national levels of maternal mortality, 1990–2015: a  
584 systematic analysis for the Global Burden of Disease Study 2015. *The Lancet*.

- 585 2016;388(10053):1775–812. Available from:  
586 <https://linkinghub.elsevier.com/retrieve/pii/S0140673616314702>  
587
- 588 6. Hug L, You D, Blencowe H, Mishra A, Wang Z, Fix MJ, et al. Global, regional,  
589 and national estimates and trends in stillbirths from 2000 to 2019: a systematic  
590 assessment. *The Lancet*. 2021;398(10302):772–85. Available from:  
591 <http://www.thelancet.com/article/S0140673621011120/fulltext>  
592
- 593 7. Kassebaum NJ. Global, regional, and national progress towards Sustainable  
594 Development Goal 3.2 for neonatal and child health: all-cause and cause-  
595 specific mortality findings from the Global Burden of Disease Study 2019. *The*  
596 *Lancet*. 2021;398(10303):870–905. Available from:  
597 <https://pubmed.ncbi.nlm.nih.gov/34416195/>  
598
- 599 8. Alkema L, Chou D, Hogan D, Zhang S, Moller AB, Gemmill A, et al. Global,  
600 regional, and national levels and trends in maternal mortality between 1990  
601 and 2015, with scenario-based projections to 2030: A systematic analysis by  
602 the UN Maternal Mortality Estimation Inter-Agency Group. *The Lancet*. 2016  
603 Jan 30;387(10017):462–74. Available from:  
604 <http://www.thelancet.com/article/S0140673615008387/fulltext>  
605
- 606 9. Andegiorgish AK, Elhoumed M, Qi Q, Zhu Z, Zeng L. Determinants of  
607 antenatal care use in nine sub-Saharan African countries: a statistical analysis  
608 of cross-sectional data from Demographic and Health Surveys. *BMJ Open*.

- 609 2022;12(2):e051675. Available from:  
610 <https://bmjopen.bmj.com/content/12/2/e051675>  
611
- 612 10. Adde KS, Dickson KS, Amu H. Prevalence and determinants of the place of  
613 delivery among reproductive age women in sub-Saharan Africa. PLoS One.  
614 2020;15(12). Available from:  
615 <https://journals.plos.org/plosone/article?id=10.1371/journal.pone.0244875>  
616
- 617 11. Tessema ZT, Yazachew L, Tesema GA, Teshale AB. Determinants of  
618 postnatal care utilization in sub-Saharan Africa: a meta and multilevel analysis  
619 of data from 36 sub-Saharan countries. Ital J Pediatr. 2020;46(1):1–11.  
620 Available from: [https://ijponline.biomedcentral.com/articles/10.1186/s13052-](https://ijponline.biomedcentral.com/articles/10.1186/s13052-020-00944-y)  
621 [020-00944-y](https://ijponline.biomedcentral.com/articles/10.1186/s13052-020-00944-y)  
622
- 623 12. Wigley AS, Tejedor-Garavito N, Alegana V, Carioli A, Ruktanonchai CW,  
624 Pezzulo C, et al. Measuring the availability and geographical accessibility of  
625 maternal health services across sub-Saharan Africa. BMC Med. 2020;18(1):1–  
626 10. Available from:  
627 <https://bmcmmedicine.biomedcentral.com/articles/10.1186/s12916-020-01707-6>  
628
- 629 13. Rosser JI, Aluri KZ, Kempinsky A, Richardson S, Bendavid E. The Effect of  
630 Healthcare Worker Density on Maternal Health Service Utilization in Sub-  
631 Saharan Africa. Am J Trop Med Hyg. 2022;106(3):939–44. Available from:  
632 <https://pubmed.ncbi.nlm.nih.gov/35026729/>  
633

- 634 14. Kruk ME, Leslie HH, Verguet S, Mbaruku GM, Adanu RMK, Langer A. Quality  
635 of basic maternal care functions in health facilities of five African countries: an  
636 analysis of national health system surveys. *Lancet Glob Health*.  
637 2016;4(11):e845–55. Available from:  
638 <http://www.thelancet.com/article/S2214109X16301802/fulltext>  
639
- 640 15. The United Nations. *Transforming our world: The 2030 Agenda for Sustainable*  
641 *Development*. 2015. Available from:  
642 [https://www.unfpa.org/resources/transforming-our-world-2030-agenda-](https://www.unfpa.org/resources/transforming-our-world-2030-agenda-sustainable-development)  
643 [sustainable-development](https://www.unfpa.org/resources/transforming-our-world-2030-agenda-sustainable-development)  
644
- 645 16. Roder-DeWan S, Madhavan S, Subramanian S, Nimako K, Lashari T, Bathula  
646 AN, et al. Service delivery redesign is a process, not a model of care. *BMJ*.  
647 2023;380:e071651. Available from: [https://www.bmj.com/content/380/bmj-](https://www.bmj.com/content/380/bmj-2022-071651)  
648 [2022-071651](https://www.bmj.com/content/380/bmj-2022-071651)  
649
- 650 17. Roder-Dewan S, Nimako K, Twum-Danso NAY, Amatya A, Langer A, Kruk M.  
651 Health system redesign for maternal and newborn survival: rethinking care  
652 models to close the global equity gap. *BMJ Glob Health*. 2020;5(10):e002539.  
653 Available from: <https://gh.bmj.com/content/5/10/e002539>  
654
- 655 18. Cassidy R, Singh NS, Schiratti PR, Semwanga A, Binyaruka P, Sachingongu  
656 N, et al. Mathematical modelling for health systems research: A systematic  
657 review of system dynamics and agent-based models. *BMC Health Serv. Res.*  
658 2019;19. Available from:



- 659 <https://bmchealthservres.biomedcentral.com/articles/10.1186/s12913-019->  
660 4627-7  
661  
662 19. Levac D, Colquhoun H, O'Brien KK. Scoping studies: Advancing the  
663 methodology. Implement Sci. 2010;5(1):1–9. Available from:  
664 <https://implementationscience.biomedcentral.com/articles/10.1186/1748-5908->  
665 [5-69](https://implementationscience.biomedcentral.com/articles/10.1186/1748-5908-)  
666  
667 20. Arksey H, O'Malley L. Scoping studies: towards a methodological framework.  
668 Int J Soc Res Methodol. 2005;8(1):19–32. Available from:  
669 <https://pubmed.ncbi.nlm.nih.gov/25034198/>  
670  
671 21. Tricco AC, Lillie E, Zarin W, O'Brien KK, Colquhoun H, Levac D, et al. PRISMA  
672 extension for scoping reviews (PRISMA-ScR): Checklist and explanation. Ann  
673 Intern Med. 2018;169(7):467–73. Available from:  
674 <https://pubmed.ncbi.nlm.nih.gov/30178033/>  
675  
676 22. UN Statistics Division. Standard country or area codes for statistical use  
677 (M49). 2023. Available from: <https://unstats.un.org/unsd/methodology/m49/>  
678  
679 23. Johns Hopkins Bloomberg School of Public Health, Bill & Melinda Gates  
680 Foundation. The Lives Saved Tool - LiST in peer-reviewed journals. 2022.  
681 Available from: <https://www.livessavedtool.org/list-in-peerreviewed-journals>  
682

- 683 24. Peters M, Godfrey C, McInerney P, Munn Z, Trico A, Khalil H. Chapter 11:  
684 Scoping Reviews. In: Aromataris E, Munn Z, editors. JBI Manual for Evidence  
685 Synthesis, JBI 2020. Available from: [https://jbi-global-](https://jbi-global-wiki.refined.site/space/MANUAL/4687342/Chapter+11%3A+Scoping+reviews)  
686 [wiki.refined.site/space/MANUAL/4687342/Chapter+11%3A+Scoping+reviews](https://jbi-global-wiki.refined.site/space/MANUAL/4687342/Chapter+11%3A+Scoping+reviews)  
687
- 688 25. Peters M, Godfrey C, Khalil H, McInerney P, Parker D, Soares CB. Guidance  
689 for conducting systematic scoping reviews. Int J Evid Based Healthc.  
690 2015;13(3):141–6. Available from: <https://pubmed.ncbi.nlm.nih.gov/26134548/>  
691
- 692 26. Pollock D, Peters MDJ, Khalil H, McInerney P, Alexander L, Tricco AC, et al.  
693 Recommendations for the extraction, analysis, and presentation of results in  
694 scoping reviews. JBI Evid Synth. 2022;21(3):520-532. Available from:  
695 <https://pubmed.ncbi.nlm.nih.gov/36081365/>  
696
- 697 27. Young N, Bowman A, Swedin K, Collins J, Blair-Stahn ND, Lindstedt PA, et al.  
698 Cost-effectiveness of antenatal multiple micronutrients and balanced energy  
699 protein supplementation compared to iron and folic acid supplementation in  
700 India, Pakistan, Mali, and Tanzania: A dynamic microsimulation study. PLoS  
701 Med. 2022;19(2):e1003902. Available from:  
702 <https://dx.plos.org/10.1371/journal.pmed.1003902>  
703
- 704 28. Willcox M, Moorthy A, Mohan D, Romano K, Hutchful D, Mehl G, et al. Mobile  
705 Technology for Community Health in Ghana: Is Maternal Messaging and  
706 Provider Use of Technology Cost-Effective in Improving Maternal and Child

- 707 Health Outcomes at Scale? J Med Internet Res. 2019;21(2). Available from:  
708 <https://pubmed.ncbi.nlm.nih.gov/30758296/>  
709
- 710 29. Tsiachristas A, Gathara D, Aluvaala J, Chege T, Barasa E, English M.  
711 Effective coverage and budget implications of skill-mix change to improve  
712 neonatal nursing care: an explorative simulation study in Kenya. BMJ Glob  
713 Health. 2019;4(6):e001817. Available from:  
714 <https://gh.bmj.com/lookup/doi/10.1136/bmjgh-2019-001817>  
715
- 716 30. Stenberg K, Watts R, Bertram MY, Engesveen K, Maliqi B, Say L, et al. Cost-  
717 Effectiveness of Interventions to Improve Maternal, Newborn and Child Health  
718 Outcomes: A WHO-CHOICE Analysis for Eastern Sub-Saharan Africa and  
719 South-East Asia. Int J Health Policy Manag. 2021;10(11):706–23. Available  
720 from: <https://pubmed.ncbi.nlm.nih.gov/33904699/>  
721
- 722 31. Semwanga AR, Nakubulwa S, Adam T. Applying a system dynamics modelling  
723 approach to explore policy options for improving neonatal health in Uganda.  
724 Health Res Policy Syst. 2016;14(1):35. Available from: [http://health-policy-](http://health-policy-systems.biomedcentral.com/articles/10.1186/s12961-016-0101-8)  
725 [systems.biomedcentral.com/articles/10.1186/s12961-016-0101-8](http://health-policy-systems.biomedcentral.com/articles/10.1186/s12961-016-0101-8)  
726
- 727 32. Shrimme MG, Iverson KR, Yorlets R, Roder-Dewan S, Gage AD, Leslie H, et al.  
728 Predicted effect of regionalised delivery care on neonatal mortality, utilisation,  
729 financial risk, and patient utility in Malawi: an agent-based modelling analysis.  
730 Articles Lancet Glob Health. 2019;7:932–71. Available from:

- 731 [https://www.thelancet.com/journals/langlo/article/PIIS2214-109X\(19\)30170-](https://www.thelancet.com/journals/langlo/article/PIIS2214-109X(19)30170-)  
732 [6/fulltext](https://www.thelancet.com/journals/langlo/article/PIIS2214-109X(19)30170-6/fulltext)  
733
- 734 33. Pagel C, Lewycka S, Colbourn T, Mwansambo C, Meguid T, Chiudzu G, et al.  
735 Estimation of potential effects of improved community-based drug provision, to  
736 augment health-facility strengthening, on maternal mortality due to post-partum  
737 haemorrhage and sepsis in sub-Saharan Africa: an equity-effectiveness  
738 model. *Lancet*. 2009;374(9699):1441–8. Available from:  
739 [https://www.thelancet.com/journals/lancet/article/PIIS014067360961566X/fullte](https://www.thelancet.com/journals/lancet/article/PIIS014067360961566X/fulltext)  
740 [xt](https://www.thelancet.com/journals/lancet/article/PIIS014067360961566X/fulltext)  
741
- 742 34. Nadkarni D, Minocha A, Harpaldas H, Kim G, Gopaluni A, Gravelyn S, et al.  
743 Predicting resource-dependent maternal health outcomes at a referral hospital  
744 in Zanzibar using patient trajectories and mathematical modeling. Brownie SM,  
745 editor. *PLoS One*. 2019;14(3):e0212753. Available from:  
746 <https://dx.plos.org/10.1371/journal.pone.0212753>  
747
- 748 35. Michalow J, Chola L, McGee S, Tugendhaft A, Pattinson R, Kerber K, et al.  
749 Triple return on investment: the cost and impact of 13 interventions that could  
750 prevent stillbirths and save the lives of mothers and babies in South Africa.  
751 *BMC Pregnancy Childbirth*. 2015;15:39. Available from:  
752 <https://www.ncbi.nlm.nih.gov/pmc/articles/PMC4337184/>  
753
- 754 36. Memirie ST, Tolla MT, Desalegn D, Hailemariam M, Norheim OF, Verguet S,  
755 et al. A cost-effectiveness analysis of maternal and neonatal health

- 756 interventions in Ethiopia. Health Policy Plan. 2019;34(4):289–97. Available  
757 from: <https://pubmed.ncbi.nlm.nih.gov/31106346/>  
758
- 759 37. McPake B, Edoke I, Witter S, Kielmann K, Taegtmeier M, Dieleman M, et al.  
760 Cost-effectiveness of community-based practitioner programmes in Ethiopia,  
761 Indonesia and Kenya. Bull World Health Organ. 2015;93(9):631-639A.  
762 Available from: <https://www.ncbi.nlm.nih.gov/pmc/articles/PMC4581637/>  
763
- 764 38. McClure EM, Jones B, Rouse DJ, Griffin JB, Kamath-Rayne BD, Downs A, et  
765 al. Tranexamic acid to reduce postpartum hemorrhage: A MANDATE  
766 systematic review and analyses of impact on maternal mortality. Am J  
767 Perinatol. 2015;32(5):469–74.  
768
- 769 39. Júnior JM, Cane RM, Gonçalves MP, Sambo J, Konikoff J, Fernandes Q, et al.  
770 Projecting the lives saved by continuing the historical scale-up of child and  
771 maternal health interventions in Mozambique until 2030. J Glob Health.  
772 2019;9(1):11102. Available from:  
773 [https://www.ncbi.nlm.nih.gov/pmc/articles/PMC6513506/#:~:text=If%20historic  
774 al%20trends%20continue%2C%20coverage,constant%20from%202015%20to  
775 %202030.](https://www.ncbi.nlm.nih.gov/pmc/articles/PMC6513506/#:~:text=If%20historic,constant%20from%202015%20to%202030.)  
776
- 777 40. LeFevre A, Cabrera-Escobar MA, Mohan D, Eriksen J, Rogers D, Neo  
778 Parsons A, et al. Forecasting the Value for Money of Mobile Maternal Health  
779 Information Messages on Improving Utilization of Maternal and Child Health  
780 Services in Gauteng, South Africa: Cost-Effectiveness Analysis. JMIR Mhealth

- 781 Uhealth. 2018;6(7):e153. Available from:  
782 <https://www.ncbi.nlm.nih.gov/pmc/articles/PMC6086931/#:~:text=Conclusions,>  
783 [small%20margins%20of%20coverage%20increases.](https://www.ncbi.nlm.nih.gov/pmc/articles/PMC6086931/#:~:text=Conclusions,)  
784
- 785 41. Kumar MB, Madan JJ, Auguste P, Taegtmeier M, Otiso L, Ochieng CB, et al.  
786 Cost-effectiveness of community health systems strengthening: quality  
787 improvement interventions at community level to realise maternal and child  
788 health gains in Kenya. *BMJ Glob Health*. 2021;6(3). Available from:  
789 <https://gh.bmj.com/content/6/3/e002452>  
790
- 791 42. Khurmi MS, Sayinzoga F, Berhe A, Bucyana T, Mwali AK, Manzi E, et al.  
792 Newborn Survival Case Study in Rwanda - Bottleneck Analysis and  
793 Projections in Key Maternal and Child Mortality Rates Using Lives Saved Tool  
794 (LiST). *Int J MCH AIDS*. 2017;6(2):93–108. Available from:  
795 <https://pubmed.ncbi.nlm.nih.gov/29367886/>  
796
- 797 43. Kamath-Rayne BD, Griffin JB, Moran K, Jones B, Downs A, McClure EM, et al.  
798 Resuscitation and Obstetrical Care to Reduce Intrapartum-Related Neonatal  
799 Deaths: A MANDATE Study. *Matern Child Health J*. 2015;19(8):1853–63.  
800 Available from: <https://pubmed.ncbi.nlm.nih.gov/25656720/>  
801
- 802 44. Jo Y, Labrique AB, Lefevre AE, Mehl G, Pfaff T, Walker N, et al. Using the  
803 lives saved tool (LiST) to model mHealth impact on neonatal survival in  
804 resource-limited settings. *PLoS One*. 2014;9(7):e102224. Available from:  
805 <https://journals.plos.org/plosone/article?id=10.1371/journal.pone.0102224>

806

807 45. Herrick T, Mvundura M, Burke TF, Abu-Haydar E. A low-cost uterine balloon  
808 tamponade for management of postpartum hemorrhage: modeling the  
809 potential impact on maternal mortality and morbidity in sub-Saharan Africa.  
810 BMC Pregnancy Childbirth. 2017 Nov 13;17(1). Available from:  
811 <https://pubmed.ncbi.nlm.nih.gov/29132342/>

812

813 46. Griffin JB, McClure EM, Kamath-Rayne BD, Hepler BM, Rouse DJ, Jobe AH,  
814 et al. Interventions to reduce neonatal mortality: a mathematical model to  
815 evaluate impact of interventions in sub-Saharan Africa. *Acta Paediatr.*  
816 2017;106(8):1286–95. Available from:  
817 <https://onlinelibrary.wiley.com/doi/10.1111/apa.13853>

818

819 47. Griffin JB, Jobe AH, Rouse D, McClure EM, Goldenberg RL, Kamath-Rayne  
820 BD. Evaluating WHO-Recommended Interventions for Preterm Birth: A  
821 Mathematical Model of the Potential Reduction of Preterm Mortality in Sub-  
822 Saharan Africa. *Glob Health Sci Pract.* 2019;7(2):215–27. Available from:  
823 <http://www.ghspjournal.org/lookup/doi/10.9745/GHSP-D-18-00402>

824

825 48. Goldenberg RL, Jones B, Griffin JB, Rouse DJ, Kamath-Rayne BD, Trivedi N,  
826 et al. Reducing maternal mortality from preeclampsia and eclampsia in low-  
827 resource countries - what should work? *Acta Obstet Gynecol Scand.*  
828 2015;94(2):148–55. Available from:  
829 <https://onlinelibrary.wiley.com/doi/10.1111/aogs.12533>

830

- 831 49. Goldenberg RL, Griffin JB, Kamath-Rayne BD, Harrison M, Rouse DJ, Moran  
832 K, et al. Clinical interventions to reduce stillbirths in sub-Saharan Africa: a  
833 mathematical model to estimate the potential reduction of stillbirths associated  
834 with specific obstetric conditions. *BJOG*. 2018;125(2):119–29. Available from:  
835 <https://pubmed.ncbi.nlm.nih.gov/27704677/>  
836
- 837 50. Friberg IK, Kinney M V., Lawn JE, Kerber KJ, Odubanjo MO, Bergh AM, et al.  
838 Sub-Saharan Africa’s mothers, newborns, and children: how many lives could  
839 be saved with targeted health interventions? *PLoS Med*. 2010;7(6). Available  
840 from: <https://pubmed.ncbi.nlm.nih.gov/20574515/>  
841
- 842 51. Epiu I, Alia G, Mukisa J, Tavrow P, Lamorde M, Kuznik A. Estimating the cost  
843 and cost-effectiveness for obstetric fistula repair in hospitals in Uganda: a low  
844 income country. *Health Policy Plan*. 2018;33(9):999–1008. Available from:  
845 [https://www.ncbi.nlm.nih.gov/pmc/articles/PMC6263022/#:~:text=The%20cost  
846 %20of%20providing%20fistula,per%20DALY%20averted%20of%20%2454.](https://www.ncbi.nlm.nih.gov/pmc/articles/PMC6263022/#:~:text=The%20cost%20of%20providing%20fistula,per%20DALY%20averted%20of%20%2454.)  
847
- 848 52. Curry LA, Byam P, Linnander E, Andersson KM, Abebe Y, Zerihun A, et al.  
849 Evaluation of the Ethiopian Millennium Rural Initiative: impact on mortality and  
850 cost-effectiveness. *PLoS One*. 2013;8(11):e79847. Available from:  
851 <https://pubmed.ncbi.nlm.nih.gov/24260307/>  
852
- 853 53. Chola L, Pillay Y, Barron P, Tugendhaft A, Kerber K, Hofman K. Cost and  
854 impact of scaling up interventions to save lives of mothers and children: taking



- 855 South Africa closer to MDGs 4 and 5. *Glob Health Action*. 2015;8(1). Available  
856 from: <https://pubmed.ncbi.nlm.nih.gov/25906769/>  
857
- 858 54. Chola L, Fadnes LT, Engebretsen IMS, Nkonki L, Nankabirwa V, Sommerfelt  
859 H, et al. Cost-Effectiveness of Peer Counselling for the Promotion of Exclusive  
860 Breastfeeding in Uganda. *PLoS One*. 2015;10(11). Available from:  
861 <https://journals.plos.org/plosone/article?id=10.1371/journal.pone.0142718>  
862
- 863 55. Carvalho N, Hoque ME, Oliver VL, Byrne A, Kermode M, Lambert P, et al.  
864 Cost-effectiveness of inhaled oxytocin for prevention of postpartum  
865 haemorrhage: a modelling study applied to two high burden settings. *BMC*  
866 *Med*. 2020;18(1):201. Available from:  
867 <https://bmcmmedicine.biomedcentral.com/articles/10.1186/s12916-020-01658-y>  
868
- 869 56. Bhutta ZA, Das JK, Rizvi A, Gaffey MF, Walker N, Horton S, et al. Evidence-  
870 based interventions for improvement of maternal and child nutrition: What can  
871 be done and at what cost? *The Lancet*. 2013;382(9890):452–77. Available  
872 from: <http://www.thelancet.com/article/S0140673613609964/fulltext>  
873
- 874 57. Bartlett L, Weissman E, Gubin R, Patton-Molitors R, Friberg IK. The impact  
875 and cost of scaling up midwifery and obstetrics in 58 low- and middle-income  
876 countries. *PLOS One*. 2014;9(6):e98550. Available from:  
877 <https://journals.plos.org/plosone/article?id=10.1371/journal.pone.0098550>  
878

- 879 58. Ali A, Nudel J, Heberle CR, Santorino D, Olson KR, Hur C. Cost effectiveness  
880 of a novel device for improving resuscitation of apneic newborns. *BMC Pediatr.*  
881 2020;20(1):46. Available from:  
882 <https://bmcpediatr.biomedcentral.com/articles/10.1186/s12887-020-1925-5>  
883
- 884 59. David S, Abbas-Chorfa F, Vanhems P, Vallin B, Iwaz J, Ecochard R.  
885 Promotion of WHO feeding recommendations: a model evaluating the effects  
886 on HIV-free survival in African children. *J Hum Lact.* 2008;24(2):140–9.  
887 Available from: <https://pubmed.ncbi.nlm.nih.gov/18436965/>  
888
- 889 60. Darmstadt GL, Walker N, Lawn JE, Bhutta ZA, Haws RA, Cousens S. Saving  
890 newborn lives in Asia and Africa: cost and impact of phased scale-up of  
891 interventions within the continuum of care. *Health Policy Plan.*  
892 2008;23(2):101–17. Available from:  
893 <https://academic.oup.com/heapol/article/23/2/101/592767>  
894
- 895 61. Bradley SEK, Prata N, Young-Lin N, Bishai DM. Cost-effectiveness of  
896 misoprostol to control postpartum hemorrhage in low-resource settings.  
897 *International Journal of Gynecology & Obstetrics.* 2007;97(1):52–6. Available  
898 from: <http://doi.wiley.com/10.1016/j.ijgo.2006.12.005>  
899
- 900 62. Baggaley RF, Burgin J, Campbell OMR. The potential of medical abortion to  
901 reduce maternal mortality in Africa: what benefits for Tanzania and Ethiopia?  
902 *PLoS One.* 2010;5(10):e13260. Available from:  
903 <https://journals.plos.org/plosone/article?id=10.1371/journal.pone.0013260>

904

905 63. Chou VB, Walker N, Kanyangarara M. Estimating the global impact of poor  
906 quality of care on maternal and neonatal outcomes in 81 low- and middle-  
907 income countries: A modeling study. PLoS Med. 2019;16(12):e1002990.  
908 Available from: <https://pubmed.ncbi.nlm.nih.gov/31851685/>

909

910 64. Nove A, Friberg IK, de Bernis L, McConville F, Moran AC, Najjemba M, et al.  
911 Potential impact of midwives in preventing and reducing maternal and neonatal  
912 mortality and stillbirths: a Lives Saved Tool modelling study. Lancet Glob  
913 Health. 2021;9(1):e24–32. Available from:  
914 [https://www.thelancet.com/journals/langlo/article/PIIS2214-109X\(20\)30397-](https://www.thelancet.com/journals/langlo/article/PIIS2214-109X(20)30397-1/fulltext)  
915 [1/fulltext](https://www.thelancet.com/journals/langlo/article/PIIS2214-109X(20)30397-1/fulltext)

916

917 65. Harrison MS, Griffin JB, McClure EM, Jones B, Moran K, Goldenberg RL.  
918 Maternal Mortality from Obstructed Labor: A MANDATE Analysis of the Ability  
919 of Technology to Save Lives in Sub-Saharan Africa. Am J Perinatol.  
920 2016;33(9):873–81. Available from:  
921 <https://pubmed.ncbi.nlm.nih.gov/27031054/>

922

923 66. Hitimana R, Lindholm L, Mogren I, Krantz G, Nzayirambaho M, Sengoma JPS,  
924 et al. Incremental cost and health gains of the 2016 WHO antenatal care  
925 recommendations for Rwanda: results from expert elicitation. Health Res  
926 Policy Syst. 2019;17(1):36. Available from: [https://health-policy-](https://health-policy-systems.biomedcentral.com/articles/10.1186/s12961-019-0439-9)  
927 [systems.biomedcentral.com/articles/10.1186/s12961-019-0439-9](https://health-policy-systems.biomedcentral.com/articles/10.1186/s12961-019-0439-9)

928

- 929 67. Fotso JC, Ambrose A, Hutchinson P, Ali D. Improving maternal and newborn  
930 care: cost-effectiveness of an innovation to rebrand traditional birth attendants  
931 in Sierra Leone. *Int J Public Health*. 2020;65(9):1603–12. Available from:  
932 <https://pubmed.ncbi.nlm.nih.gov/33037894/>  
933
- 934 68. Erim DO, Resch SC, Goldie SJ. Assessing health and economic outcomes of  
935 interventions to reduce pregnancy-related mortality in Nigeria. *BMC Public*  
936 *Health*. 2012 Sep 14;12(1):1–11. Available from:  
937 <https://bmcpublichealth.biomedcentral.com/articles/10.1186/1471-2458-12-786>  
938
- 939 69. McGee SA, Chola L, Tugendhaft A, Mubaiwa V, Moran N, McKerrow N, et al.  
940 Strategic planning for saving the lives of mothers, newborns and children and  
941 preventing stillbirths in KwaZulu-Natal province South Africa: modelling using  
942 the Lives Saved Tool (LiST). *BMC Public Health*. 2016;16:49. Available from:  
943 [https://bmcpublichealth.biomedcentral.com/articles/10.1186/s12889-015-2661-](https://bmcpublichealth.biomedcentral.com/articles/10.1186/s12889-015-2661-x)  
944 [x](https://bmcpublichealth.biomedcentral.com/articles/10.1186/s12889-015-2661-x)  
945
- 946 70. Keita Y, Sangho H, Robertson T, Vignola E, Traoré M, Munos M. Using the  
947 Lives Saved Tool to aid country planning in meeting mortality targets: a case  
948 study from Mali. *BMC Public Health*. 2017;17(Suppl 4):777. Available from:  
949 [https://bmcpublichealth.biomedcentral.com/articles/10.1186/s12889-017-4749-](https://bmcpublichealth.biomedcentral.com/articles/10.1186/s12889-017-4749-y)  
950 [y](https://bmcpublichealth.biomedcentral.com/articles/10.1186/s12889-017-4749-y)  
951
- 952 71. Chou VB, Friberg IK, Christian M, Walker N, Perry HB. Expanding the  
953 population coverage of evidence-based interventions with community health

- 954 workers to save the lives of mothers and children: an analysis of potential  
955 global impact using the Lives Saved Tool (LiST). J Glob Health.  
956 2017;7(2):20401. Available from: <https://pubmed.ncbi.nlm.nih.gov/28959436/>  
957
- 958 72. Homer CSE, Friberg IK, Dias MAB, ten Hoop-Bender P, Sandall J, Speciale  
959 AM, et al. The projected effect of scaling up midwifery. Lancet.  
960 2014;384(9948):1146–57. Available from:  
961 [https://www.thelancet.com/journals/lancet/article/PIIS0140-6736\(14\)60790-](https://www.thelancet.com/journals/lancet/article/PIIS0140-6736(14)60790-)  
962 [X/fulltext](https://www.thelancet.com/journals/lancet/article/PIIS0140-6736(14)60790-X/fulltext)  
963
- 964 73. Bhutta ZA, Yakoob MY, Lawn JE, Rizvi A, Friberg IK, Weissman E, et al.  
965 Stillbirths: what difference can we make and at what cost? Lancet.  
966 2011;377(9776):1523–38. Available from:  
967 <https://pubmed.ncbi.nlm.nih.gov/21496906/>  
968
- 969 74. Marsh A, Munos M, Baya B, Sanon D, Gilroy K, Bryce J. Using LiST to model  
970 potential reduction in under-five mortality in Burkina Faso. BMC Public Health.  
971 2013;13 Suppl 3(Suppl 3). Available from:  
972 <https://pubmed.ncbi.nlm.nih.gov/24564341/>  
973
- 974 75. Ruhago GM, Ngalesoni FN, Norheim OF. Addressing inequity to achieve the  
975 maternal and child health millennium development goals: looking beyond  
976 averages. BMC Public Health. 2012;12:1119. Available from:  
977 <https://bmcpublichealth.biomedcentral.com/articles/10.1186/1471-2458-12->  
978 1119

979

980 76. Onarheim KH, Tessema S, Johansson KA, Eide KT, Norheim OF, Miljeteig I.  
981 Prioritizing child health interventions in Ethiopia: modeling impact on child  
982 mortality, life expectancy and inequality in age at death. PLoS One. 2012;7(8).  
983 Available from: <https://pubmed.ncbi.nlm.nih.gov/22879890/>

984

985 77. Chou VB, Bubb-Humfryes O, Sanders R, Walker N, Stover J, Cochrane T, et  
986 al. Pushing the envelope through the Global Financing Facility: potential  
987 impact of mobilising additional support to scale-up life-saving interventions for  
988 women, children and adolescents in 50 high-burden countries. BMJ Glob  
989 Health. 2018;3(5):e001126. Available from:  
990 <https://gh.bmj.com/content/3/5/e001126>

991

992 78. Walker N, Yenokyan G, Friberg IK, Bryce J. Patterns in coverage of maternal,  
993 newborn, and child health interventions: projections of neonatal and under-5  
994 mortality to 2035. Lancet. 2013;382(9897):1029–38. Available from:  
995 <https://pubmed.ncbi.nlm.nih.gov/24054534/>

996

997 79. Ruducha J, Mann C, Singh NS, Gemebo TD, Tessema NS, Baschieri A, et al.  
998 How Ethiopia achieved Millennium Development Goal 4 through multisectoral  
999 interventions: a Countdown to 2015 case study. Lancet Glob Health.  
1000 2017;5(11):e1142–51. Available from:

1001 [https://www.thelancet.com/journals/langlo/article/PIIS2214-109X\(17\)30331-](https://www.thelancet.com/journals/langlo/article/PIIS2214-109X(17)30331-5/fulltext)  
1002 [5/fulltext](https://www.thelancet.com/journals/langlo/article/PIIS2214-109X(17)30331-5/fulltext)

1003

- 1004 80. Keats EC, Ngugi A, Macharia W, Akseer N, Khaemba EN, Bhatti Z, et al.  
1005 Progress and priorities for reproductive, maternal, newborn, and child health in  
1006 Kenya: a Countdown to 2015 country case study. *Lancet Glob Health*.  
1007 2017;5(8):e782–95. Available from:  
1008 <https://pubmed.ncbi.nlm.nih.gov/28716350/>  
1009
- 1010 81. Afnan-Holmes H, Magoma M, John T, Levira F, Msemu G, Armstrong CE, et  
1011 al. Tanzania’s countdown to 2015: an analysis of two decades of progress and  
1012 gaps for reproductive, maternal, newborn, and child health, to inform priorities  
1013 for post-2015. *Lancet Glob Health*. 2015;3(7):e396-409. Available from:  
1014 [https://www.thelancet.com/journals/langlo/article/PIIS2214-109X\(15\)00059-](https://www.thelancet.com/journals/langlo/article/PIIS2214-109X(15)00059-5/fulltext)  
1015 [5/fulltext](https://www.thelancet.com/journals/langlo/article/PIIS2214-109X(15)00059-5/fulltext)  
1016
- 1017 82. Macicame I, Magaço A, Cassocera M, Amado C, Feriano A, Chicumbe S, et  
1018 al. Intervention heroes of Mozambique from 1997 to 2015: estimates of  
1019 maternal and child lives saved using the Lives Saved Tool. *J Glob Health*.  
1020 2018;8(2):21202. Available from:  
1021 <https://www.ncbi.nlm.nih.gov/pmc/articles/PMC6300161/>  
1022
- 1023 83. Niyeha D, Malamsha D, Mpembeni R, Charwe D, Epimark S, Malima K, et al.  
1024 Explaining progress towards Millennium Development Goal 4 for child survival  
1025 in Tanzania. *J Glob Health*. 2018;8(2):21201. Available from:  
1026 <https://www.ncbi.nlm.nih.gov/pmc/articles/PMC6319734/>  
1027

- 1028 84. Amouzou A, Habi O, Bensaïd K. Reduction in child mortality in Niger: a  
1029 Countdown to 2015 country case study. *Lancet*. 2012;380(9848):1169–78.  
1030 Available from:  
1031 [https://pubmed.ncbi.nlm.nih.gov/22999428/#:~:text=Findings%3A%20The%20](https://pubmed.ncbi.nlm.nih.gov/22999428/#:~:text=Findings%3A%20The%20mortality%20rate%20in,decline%20of%205%C2%B71%25)  
1032 [mortality%20rate%20in,decline%20of%205%C2%B71%25](https://pubmed.ncbi.nlm.nih.gov/22999428/#:~:text=Findings%3A%20The%20mortality%20rate%20in,decline%20of%205%C2%B71%25).  
1033
- 1034 85. Kanyuka M, Ndawala J, Mleme T, Chisesa L, Makwemba M, Amouzou A, et al.  
1035 Malawi and Millennium Development Goal 4: a Countdown to 2015 country  
1036 case study. *Lancet Glob Health*. 2016;4(3):e201–14. Available from:  
1037 <https://pubmed.ncbi.nlm.nih.gov/26805586/>  
1038
- 1039 86. Ward ZJ, Atun R, King G, Sequeira Dmello B, Goldie SJ. A simulation-based  
1040 comparative effectiveness analysis of policies to improve global maternal  
1041 health outcomes. *Nat Med*. 2023;29(5):1262–72. Available from:  
1042 <https://doi.org/10.1038/s41591-023-02310-x>  
1043
- 1044 87. Petrou S, Gray A. Economic evaluation using decision analytical modelling:  
1045 design, conduct, analysis, and reporting. *BMJ*. 2011;342(7808). Available  
1046 from: <https://www.bmj.com/content/342/bmj.d1766>  
1047
- 1048 88. Rautenberg T, Gerritsen A, Downes M. Health Economic Decision Tree  
1049 Models of Diagnostics for Dummies: A Pictorial Primer. *Diagnostics (Basel)*.  
1050 2020;10(3). Available from: <https://pubmed.ncbi.nlm.nih.gov/32183372/>  
1051



- 1052 89. Johns Hopkins Bloomberg School of Public Health. LiST Visualizer. 2023.  
1053 Available from: <https://listvisualizer.org/>  
1054
- 1055 90. Research Triangle Institute International. MANDATE: Maternal and Neonatal  
1056 Directed Assessment of Technology. 2014. MANDATE: Condition Maps.  
1057 Available from: <http://www.mandate4mnh.org/help/maps>  
1058
- 1059 91. Stegmuller AR, Self A, Litvin K, Robertson T. How is the Lives Saved Tool  
1060 (LiST) used in the global health community? Results of a mixed-methods LiST  
1061 user study. BMC Public Health. 2017;17(4):143–50. Available from:  
1062 [https://bmcpublichealth.biomedcentral.com/articles/10.1186/s12889-017-4750-](https://bmcpublichealth.biomedcentral.com/articles/10.1186/s12889-017-4750-5)  
1063 5  
1064
- 1065 92. Walker N, Tam Y, Friberg IK. Overview of the Lives Saved Tool (LiST). BMC  
1066 Public Health. 2013;13(Suppl 3):S1. Available from:  
1067 <http://www.jhsph.edu/IIP/list>  
1068
- 1069 93. Sturmberg J, Lanham HJ. Understanding health care delivery as a complex  
1070 system: achieving best possible health outcomes for individuals and  
1071 communities by focusing on interdependencies. J Eval Clin Pract.  
1072 2014;20(6):1005–9. Available from:  
1073 <https://pubmed.ncbi.nlm.nih.gov/24797788/>  
1074
- 1075 94. Lipsitz LA, Seniorlife H, Israel B. Understanding Health Care as a Complex  
1076 System: The Foundation for Unintended Consequences. JAMA.

- 1077 2012;308(3):243–4. Available from:  
1078 <https://www.ncbi.nlm.nih.gov/pmc/articles/PMC3511782/>  
1079
- 1080 95. Martínez-García M, Hernández-Lemus E. Health Systems as Complex  
1081 Systems. *American Journal of Operations Research*. 2013;2013(01):113–26.  
1082 Available from:  
1083 <https://www.scirp.org/journal/paperinformation.aspx?paperid=27538>  
1084
- 1085 96. Fink G, Cohen J. Delivering quality: safe childbirth requires more than facilities.  
1086 *Lancet Glob Health*. 2019.;7(8):e990–1. Available from:  
1087 [https://www.thelancet.com/journals/langlo/article/PIIS2214-109X\(19\)30193-7/fulltext#:~:text=Facility%20birth%20does%20not%20necessarily,of%20safe%2Dguarding%20uncomplicated%20births.](https://www.thelancet.com/journals/langlo/article/PIIS2214-109X(19)30193-7/fulltext#:~:text=Facility%20birth%20does%20not%20necessarily,of%20safe%2Dguarding%20uncomplicated%20births.)  
1088  
1089  
1090
- 1091 97. Gabrysch S, Nesbitt RC, Schoeps A, Hurt L, Soremekun S, Edmond K, et al.  
1092 Does facility birth reduce maternal and perinatal mortality in Brong Ahafo,  
1093 Ghana? A secondary analysis using data on 119 244 pregnancies from two  
1094 cluster-randomised controlled trials. *Lancet Glob Health*. 2019.;7(8):e1074–87.  
1095 Available from: [https://www.thelancet.com/journals/langlo/article/PIIS2214-109X\(19\)30165-2/fulltext](https://www.thelancet.com/journals/langlo/article/PIIS2214-109X(19)30165-2/fulltext)  
1096  
1097
- 1098 98. de Savigny D & Adam T. Systems thinking for health systems strengthening.  
1099 2009. Available from: <https://apps.who.int/iris/handle/10665/44204>  
1100

- 1101 99. Paina L, Peters DH. Understanding pathways for scaling up health services  
1102 through the lens of complex adaptive systems. Health Policy Plan. 2012  
1103 Aug;27(5):365–73. Available from: <https://pubmed.ncbi.nlm.nih.gov/21821667>  
1104
- 1105 100. Verguet S, Feldhaus I, Jiang Kwete X, Aqil A, Atun R, Bishai D, et al. Health  
1106 system modelling research: towards a whole-health-system perspective for  
1107 identifying good value for money investments in health system strengthening.  
1108 BMJ Glob Health. 2019;4(2):e001311. Available from:  
1109 <https://gh.bmj.com/content/4/2/e001311>  
1110
- 1111 101. Briggs ADM, Wolstenholme J, Blakely T, Scarborough P. Choosing an  
1112 epidemiological model structure for the economic evaluation of non-  
1113 communicable disease public health interventions. Popul Health Metr.  
1114 2016;14(1):1–12. Available from:  
1115 [https://pophealthmetrics.biomedcentral.com/articles/10.1186/s12963-016-](https://pophealthmetrics.biomedcentral.com/articles/10.1186/s12963-016-0085-1)  
1116 [0085-1](https://pophealthmetrics.biomedcentral.com/articles/10.1186/s12963-016-0085-1)  
1117
- 1118 102. Tracy M, Cerdá M, Keyes KM. Agent-Based Modeling in Public Health: Current  
1119 Applications and Future Directions. Annu Rev Public Health. 2018;39:77–94.  
1120 Available from: <https://pubmed.ncbi.nlm.nih.gov/29328870/>  
1121
- 1122 103. Willem L, Verelst F, Bilcke J, Hens N, Beutels P. Lessons from a decade of  
1123 individual-based models for infectious disease transmission: A systematic  
1124 review (2006-2015). BMC Infect Dis. 2017;17(1):1–16. Available from:  
1125 <https://bmcinfectdis.biomedcentral.com/articles/10.1186/s12879-017-2699-8>

1126

1127

1128

1129 104. Marshall BDL. Agent-Based Modeling. In: El-Sayed A, Galea S (ed.) Systems  
1130 Science and Population Health. Oxford University Press; 2017. p. 87–98.

1131 Available from:

1132 [https://oxford.universitypressscholarship.com/view/10.1093/acprof:oso/978019](https://oxford.universitypressscholarship.com/view/10.1093/acprof:oso/9780190492397.001.0001/acprof-9780190492397-chapter-8)  
1133 [0492397.001.0001/acprof-9780190492397-chapter-8](https://oxford.universitypressscholarship.com/view/10.1093/acprof:oso/9780190492397.001.0001/acprof-9780190492397-chapter-8)

1134

1135 105. Marshall BDL. Agent-Based Modelling. In: Lash T, VanderWeele T, Haneuse  
1136 S, Rothman K, editors. Modern Epidemiology - Fourth Edition. Philidelphia:  
1137 Wolters Kluwer Publications; 2021. p. 785.

1138

1139 106. Gilbert N. The Idea of Agent-Based Modeling. In: Agent-Based Models.  
1140 California: SAGE Publications, Inc.; 2020. p. 1–23. Available from:

1141 <https://methods.sagepub.com/book/agent-based-models-2e/i214.xml>

1142

1143 107. Hammond RA. Overview of Current Concepts and Process for Agent-Based  
1144 Modeling. In: New Horizons in Modeling and Simulation for Social  
1145 Epidemiology and Public Health. John Wiley & Sons, Ltd; 2021. p. 31–43.

1146 Available from:

1147 <https://onlinelibrary.wiley.com/doi/full/10.1002/9781118589397.ch3>

1148

1149 108. Shoveller J, Viehbeck S, Di Ruggiero E, Greyson D, Thomson K, Knight R. A  
1150 critical examination of representations of context within research on population

- 1151 health interventions. Crit. Public Health 2015;26(5):487–500. Available from:  
1152 <https://www.tandfonline.com/doi/abs/10.1080/09581596.2015.1117577?journal>  
1153 Code=ccph20  
1154
- 1155 109. Adams S, Rhodes T, Lancaster K. New directions for participatory modelling in  
1156 health: Redistributing expertise in relation to localised matters of concern. Glob  
1157 Public Health. 2021;17(9):1827-1841. Available from:  
1158 [https://www.tandfonline.com/doi/citedby/10.1080/17441692.2021.1998575?scr](https://www.tandfonline.com/doi/citedby/10.1080/17441692.2021.1998575?scroll=top&needAccess=true&role=tab)  
1159 [oll=top&needAccess=true&role=tab](https://www.tandfonline.com/doi/citedby/10.1080/17441692.2021.1998575?scroll=top&needAccess=true&role=tab)  
1160
- 1161 110. Baugh Littlejohns L, Baum F, Lawless A, Freeman T. The value of a causal  
1162 loop diagram in exploring the complex interplay of factors that influence health  
1163 promotion in a multisectoral health system in Australia. Health Res Policy Syst.  
1164 2018;16(1):1–12. Available from: [https://health-policy-](https://health-policy-systems.biomedcentral.com/articles/10.1186/s12961-018-0394-x#:~:text=Creating%20a%20causal%20loop%20diagram,and%20practice%20can%20be%20improved.)  
1165 [systems.biomedcentral.com/articles/10.1186/s12961-018-0394-](https://health-policy-systems.biomedcentral.com/articles/10.1186/s12961-018-0394-x#:~:text=Creating%20a%20causal%20loop%20diagram,and%20practice%20can%20be%20improved.)  
1166 [x#:~:text=Creating%20a%20causal%20loop%20diagram,and%20practice%20](https://health-policy-systems.biomedcentral.com/articles/10.1186/s12961-018-0394-x#:~:text=Creating%20a%20causal%20loop%20diagram,and%20practice%20can%20be%20improved.)  
1167 [can%20be%20improved.](https://health-policy-systems.biomedcentral.com/articles/10.1186/s12961-018-0394-x#:~:text=Creating%20a%20causal%20loop%20diagram,and%20practice%20can%20be%20improved.)  
1168
- 1169 111. Sargent RG. Verification and validation of simulation models. Journal of  
1170 Simulation. 2013;7(1):12–24. Available from:  
1171 <https://www.tandfonline.com/action/journalInformation?journalCode=tjism20>  
1172
- 1173 112. World Health Organization. WHO recommendations: Intrapartum care for a  
1174 positive childbirth experience.. 2018 Feb. Available from:  
1175 <https://www.who.int/publications/i/item/9789241550215>

1176

1177 113. World Health Organization. WHO recommendations on antenatal care for a  
1178 positive pregnancy experience. 2016. Available from: WHO recommendations  
1179 on antenatal care for a positive pregnancy experience

1180

1181 114. World Health Organization. WHO recommendations on maternal and newborn  
1182 care for a positive postnatal experience. 2022. Available from:  
1183 <https://www.who.int/publications/i/item/9789240045989>

1184

1185 115. Lawn JE, Blencowe H, Pattinson R, Cousens S, Kumar R, Ibiebele I, et al.  
1186 Stillbirths: Where? When? Why? How to make the data count? Lancet.  
1187 2011;377(9775):1448–63. Available from:

1188 <https://pubmed.ncbi.nlm.nih.gov/21496911/>

1189

1190 116. Frøen JF, Cacciatore J, McClure EM, Kuti O, Jokhio AH, Islam M, et al.  
1191 Stillbirths: Why they matter. Lancet. 2011;377(9774):1353–66. Available from:  
1192 <https://pubmed.ncbi.nlm.nih.gov/21496911/>

1193

1194 117. Qureshi ZU, Millum J, Blencowe H, Kelley M, Fottrell E, Lawn JE, et al.  
1195 Stillbirth should be given greater priority on the global health agenda. BMJ.  
1196 2015;351. Available from: <https://www.bmj.com/content/351/bmj.h4620>

1197

1198 118. Frøen JF, Friberg IK, Lawn JE, Bhutta ZA, Pattinson RC, Allanson ER, et al.  
1199 Stillbirths: Progress and unfinished business. Lancet. 2016; 387(10018):574–

- 1200 86. Available from: <https://www.thelancet.com/journals/lancet/article/PIIS0140->  
1201 6736(15)00818-1/fulltext  
1202  
1203 119. Westby CL, Erlandsen AR, Nilsen SA, Visted E, Thimm JC. Depression,  
1204 anxiety, PTSD, and OCD after stillbirth: a systematic review. BMC Pregnancy  
1205 Childbirth. 2021 ;21(1). Available from: </pmc/articles/PMC8600867/>  
1206  
1207 120. Ota E, da Silva Lopes K, Middleton P, Flenady V, Wariki WMV, Rahman MO,  
1208 et al. Antenatal interventions for preventing stillbirth, fetal loss and perinatal  
1209 death: an overview of Cochrane systematic reviews. Cochrane Database Syst  
1210 Rev. 2020;2020(12). Available from:  
1211 <https://www.cochranelibrary.com/cdsr/doi/10.1002/14651858.CD009599.pub2/>  
1212 full  
1213  
1214 121. Wastnedge E, Waters D, Murray SR, McGowan B, Chipeta E, Nyondo-  
1215 Mipando AL, et al. Interventions to reduce preterm birth and stillbirth, and  
1216 improve outcomes for babies born preterm in low- and middle-income  
1217 countries: A systematic review. J Glob Health. 2021;11. Available from:  
1218 <https://pubmed.ncbi.nlm.nih.gov/35003711/>  
1219  
1220 122. Paez A. Grey literature: An important resource in systematic reviews. J Evid  
1221 Based Med.2017;10(3):233-240. Available from:  
1222 <https://pubmed.ncbi.nlm.nih.gov/28857505/>  
1223

- 1224 123. Walker N, Friberg IK. Introduction: reporting on updates in the scientific basis  
1225 for the Lives Saved Tool (LiST). BMC public health. 2017;17(Suppl 4):774.  
1226 Available from: <https://pubmed.ncbi.nlm.nih.gov/29143617/>  
1227
- 1228 124. Godin K, Stapleton J, Kirkpatrick SI, Hanning RM, Leatherdale ST. Applying  
1229 systematic review search methods to the grey literature: A case study  
1230 examining guidelines for school-based breakfast programs in Canada. Syst  
1231 Rev. 2015;4(1):1–10. Available from:  
1232 <https://pubmed.ncbi.nlm.nih.gov/26494010/>  
1233
- 1234 125. Abuelezam NN, Rough K, Seage GR. Individual-Based Simulation Models of  
1235 HIV Transmission: Reporting Quality and Recommendations. PLoS One.  
1236 2013;8(9). Available from:  
1237 <https://journals.plos.org/plosone/article?id=10.1371/journal.pone.0075624>  
1238
- 1239 126. Giddings R, Indravudh P, Medley GF, Bozzani F, Gafos M, Malhotra S, et al.  
1240 Infectious Disease Modelling of HIV Prevention Interventions: A Systematic  
1241 Review and Narrative Synthesis of Compartmental Models.  
1242 Pharmacoeconomics. 2023;41(6):693–707. Available from:  
1243 <https://link.springer.com/article/10.1007/s40273-023-01260-z>  
1244
- 1245 127. Colquhoun HL, Levac D, O'Brien KK, Straus S, Tricco AC, Perrier L, et al.  
1246 Scoping reviews: time for clarity in definition, methods, and reporting. J Clin  
1247 Epidemiol. 2014;67(12):1291–4. Available from:  
1248 <https://pubmed.ncbi.nlm.nih.gov/25034198/>



1249

1250 **Supporting information**

1251 S1 File. PRISMA-ScR Checklist

1252 S2 File. Data extraction form and extracted data

1253

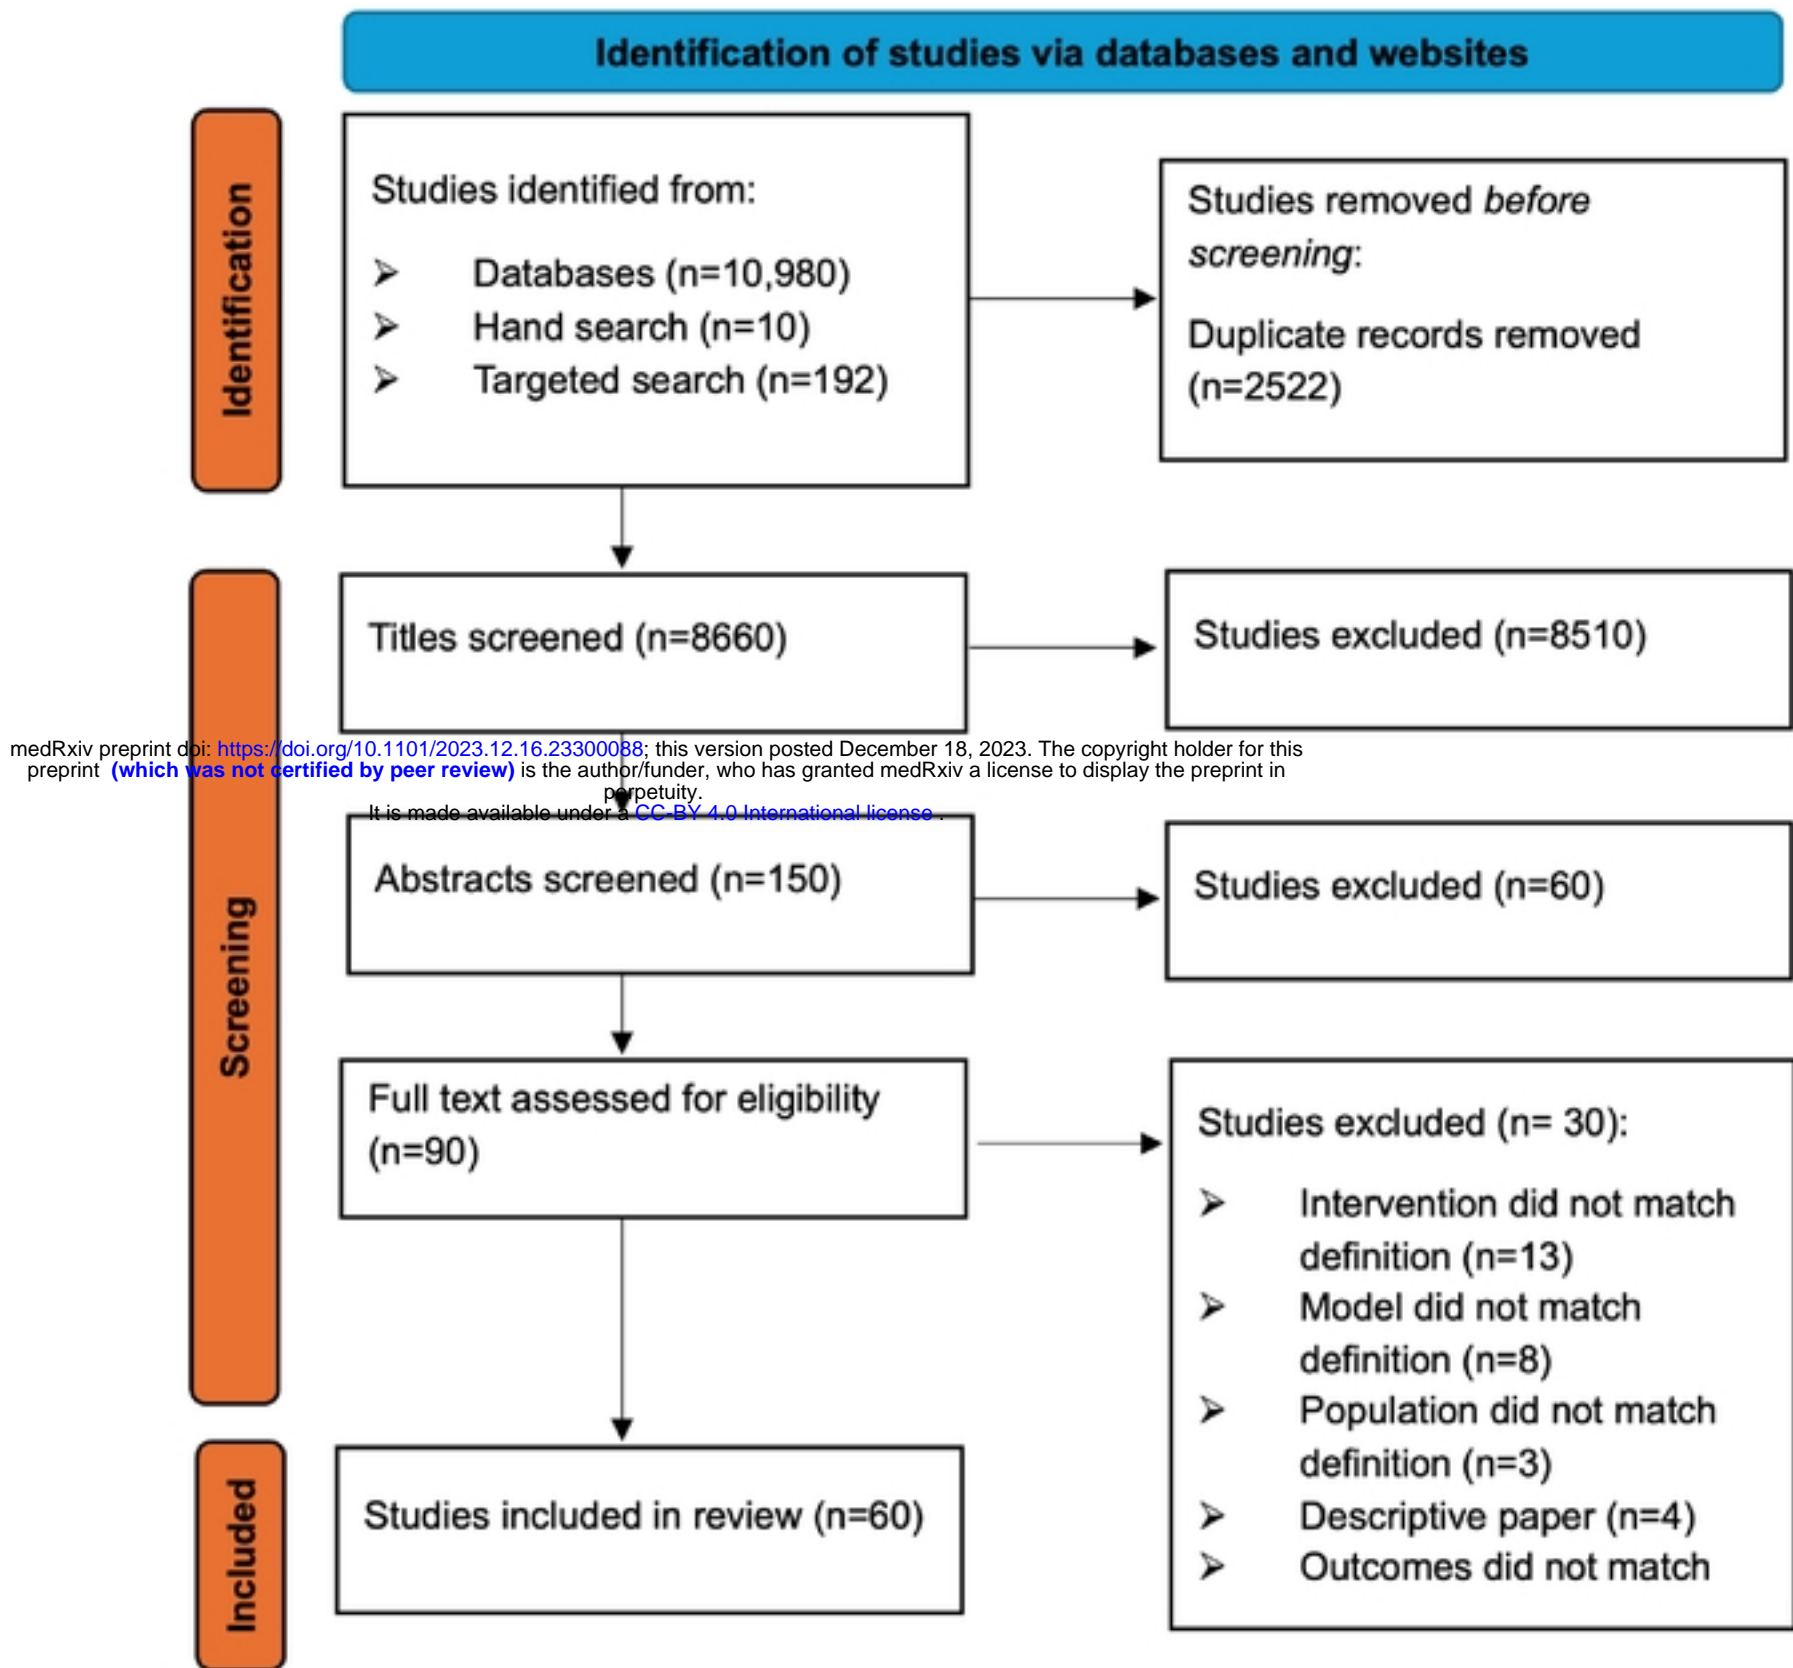

Figure
